# Supplementary material for: Stereoselective synthesis of chiral δ-lactones via an engineered carbonyl reductase
Source: Royal Society of Chemistry journal article supplement (doi:10.1039/d1cc04542c), 2021-01-01
Supplement: d1cc04542c1.pdf [file d1cc04542c1.pdf]

## Supporting Information

### **Stereoselective Synthesis of Chiral $\delta$ -Lactones via an Engineered Carbonyl Reductase**

Tao Wang,<sup>†,a</sup> Xiao-Yan Zhang,<sup>†,a</sup> Yu-Cong Zheng,<sup>a</sup> and Yun-Peng Bai<sup>\*,a</sup>

<sup>a</sup> State Key Laboratory of Bioreactor Engineering, Shanghai Collaborative Innovation Center for Biomanufacturing, East China University of Science and Technology, 130 Meilong Road, Shanghai 200237, China.

<sup>†</sup> These authors contributed equally.

# Contents

|                                                 |    |
|-------------------------------------------------|----|
| 1. Experimental Section .....                   | 3  |
| 2. Tables and figures .....                     | 6  |
| 3. Chiral GC data of enantiopure lactones ..... | 24 |
| 4. NMR spectras of enantiopure lactones .....   | 40 |

## 1. Experimental Section

### General information

All chemicals were purchased from TCI (Japan) and Aladdin and Shaoyuan (Shanghai, China), and used without further treatment unless otherwise indicated. NADPH and NADP<sup>+</sup> were purchased from Bontac Bioengineering (Shenzhen, China). Luria–Bertani (LB) medium was used to culture *E. coli* cells. GC was performed with a Shimadzu GC-2014 system with a CP-Chirasil-Dex CB column (25 m × 0.25 mm × 0.39 mm, Varian) or Rxi<sup>®</sup>-5Sil MS column (30 m × 0.25 mm × 0.25 μm) and a flame ionization detector. <sup>1</sup>H NMR (400 MHz) and <sup>13</sup>C NMR (100 MHz) spectra were recorded in CDCl<sub>3</sub>. Column chromatography was performed with silica gel of particle size 200-300 mesh. *n*-Dodecane was used as an internal standard.

### Directed evolution

A recombination plasmid containing the *SmCR*<sub>V4</sub> gene was used as the template for random mutagenesis. MnCl<sub>2</sub> (0.25 mM) was used to obtain the desired mutagenesis rate (one to two amino acid substitutions). The amplified PCR products were extracted, digested with *EcoR* I and *Hind* III, ligated into the *EcoR* I and *Hind* III sites of pET-28a, and then transformed into chemically competent *E. coli* BL21 (DE3) cells. The recombination plasmid containing the *SmCR*<sub>V4</sub> gene used was amplified by PCR with NNK codon degeneracy. The resulting PCR products were digested with Dpn I (20 U) at 37 °C for 3 h and then transformed into chemically competent *E. coli* BL21 (DE3) cells and plated on LB agar plates containing 50 μg/mL kanamycin. The colonies were picked with sterile toothpicks to inoculate LB medium (300 μL) containing 50 μg/mL kanamycin into 96-well plates. The cultures were grown overnight at 37 °C prior to inoculating LB medium (600 μL) into new 96-well plates. The plates were incubated at 37 °C for 2 h and protein expression was induced by addition of isopropyl-β-D-thiogalactopyranoside (0.2 mM) and incubating at 16 °C for 24 h. Cells were lysed by adding buffer (300 μL) containing lysozyme (1 mg/mL) and DNase I (0.01 mg/mL), and incubating at 37 °C for 2 h. The plates were centrifuged at 3500 rpm for 15 min at 4 °C. A sample (100 μL) from each well was transferred to a microtiter plate and then the reduction reaction was initiated by adding a mixture of 100 mM phosphate buffer (100 μL, pH 6.0), 0.3 mM NADPH, and 8 mM **1h**. The variant activities were determined by measuring the change in the NADPH absorbance at 340 nm for 10 min at 35 °C by using a microplate spectrophotometer (BioTek, USA). Variants with higher activities were chosen for re-screening in 96-deep-well plates, and the best performers were grown on a 100 mL scale. The best variants were selected for sequencing and

purified by N-terminal His-tagged nickel affinity chromatography for further characterization.

### **Protein Crystallization**

The sitting-drop vapor-diffusion technique was used for *SmCR<sub>V4</sub>*. The purified *SmCR<sub>V4</sub>* protein was concentrated to 15 mg mL<sup>-1</sup> and incubated with 0.6 mM NADP<sup>+</sup>. Crystallization of *SmCR<sub>V4</sub>* was performed by mixing the incubated protein (1 μL) with an equal volume of reservoir solution containing 0.1 M sodium formate, 0.1 M ammonium acetate, 0.1 M sodium citrate tribasic dihydrate, 0.1 M potassium sodium tartrate tetrahydrate, 0.1 M sodium oxamate, 0.1 M imidazole, 0.1 M MES monohydrate (pH 6.50), 12.5% v/v 2-methyl-1,3-propanediol, 12.5% polyethylene glycol 1000 and 12.5% w/v polyethylene glycol 3350 at 18 °C. Crystals were observed after 3-4 days. The crystals were then cryoprotected by transient soaking in the corresponding reservoir solution with additional 30% glycerol and transferred into liquid nitrogen. Data collection experiments were performed at the BL19U1 beamline at the Shanghai Synchrotron Radiation Facility (SSRF, China), and the data set was indexed and processed by using the HKL-2000 program suite. The *SmCR<sub>V4</sub>* crystal form diffracted in the 2.49-2.45 Å resolution range and belongs to the hexagonal space group C222<sub>1</sub>. The structure was determined by CCP4 by using the coordinates of a β-ketoacyl-acyl carrier protein reductase (PDB ID: 1Q7B) as the model. The final *R*-work/*R*-free values for the model were 18.7/24.9 after modification by CCP4. The atomic coordinates of *SmCR<sub>V4</sub>* in a complex with NADP<sup>+</sup> have been uploaded to the Protein Data Bank (PDB) under accession number 7EMG.

### **Enzyme assay and kinetic analysis**

The reductase activity was assayed at 40 °C by monitoring the decrease in the absorbance of NADPH at 340 nm with a UV spectrophotometer (Shimadzu UV-1900). The standard assay mixture (1 mL) consisted of sodium phosphate buffer (100 mM, pH 6.0, 960 μL), 5-oxodecanoic acid (200 mM, 20 μL), NADPH (10 mM, 10 μL), and pure enzyme (10 μL) at an appropriate concentration. One unit of enzyme activity (1 U) is defined as the amount of enzyme that can catalyze the oxidation of 1 μmol of NADPH per minute under the above conditions. The substrates were dissolved in dimethyl sulfoxide to give various final concentrations and then the specific activities were determined with a UV spectrophotometer. The data were processed using Origin 2018 software, based on the Michaelis-Menten equation.

### **Analytical methods**

The stereoconfigurations of the products were determined in 1 mL of reaction

solution. The solution was prepared by mixing 4 mM substrate, 10 mM glucose, 0.2 mM NADP<sup>+</sup>, an appropriate amount of enzyme solution, and *BmGDH* lyophilized crude enzymes (5 mg), and stirring at 30°C. The reaction was terminated by adding 2 M sulfuric acid solution and the reaction mixture was extracted with ethyl acetate after heating at 80°C for 1 h. Gas chromatographic analyses (GC) was conducted on a Shimadzu GC-2010 chromatograph equipped with a flame ionization detector (FID) and a CP-Chirasil-Dex CB column (25 m×0.25 mm×0.39 μm, Varian). Nitrogen was used as the carrier gas. Temperatures of the inlet and detector were set to 280°C. The enantioselectivities of lactone products were determined by chiral GC analysis.

#### **Preparation of structurally diverse δ-lactones**

The reaction mixture (50 mL) was prepared by dissolving the substrate (50-400 mmol/L), glucose (1.5 equiv with respect to the substrate), crude *SmCR<sub>M5</sub>* enzyme, lyophilized crude *BmGDH* enzymes, 5% dimethyl sulfoxide (v/v), and NADP<sup>+</sup> (0.2 mM) in a sodium phosphate buffer (100 mM, pH 6.0). The pH of the mixture was maintained at 6.0 by using 1 M Na<sub>2</sub>CO<sub>3</sub>. The reaction was performed at 30°C and 300 rpm for an appropriate time, which depended on the reaction conditions. The reaction was terminated by acidification to pH 2.0 and the mixture was extracted with ethyl acetate. The organic layer was dried over anhydrous Na<sub>2</sub>SO<sub>4</sub>. Solvent removal afforded the hydroxy acid, which was heated at 80°C for 1 h to complete lactonization. The residue was purified by flash column chromatography with a mixture of ethyl acetate and petroleum ether (1:10) as the eluent, to provide the pure δ-lactone. <sup>1</sup>H NMR (400 MHz) and <sup>13</sup>C NMR (100 MHz) spectra of the pure δ-lactones in CDCl<sub>3</sub> were obtained.

## 2. Additional tables and figures

**Table S1.** Beneficial variants obtained in the first round of random mutagenesis

| Entry | Enzyme                      | Variants | Specific activity<br>(U mg <sup>-1</sup> ) <sup>a</sup> | <i>ee</i> (%)   | Fold |
|-------|-----------------------------|----------|---------------------------------------------------------|-----------------|------|
| 1     | <i>SmCR</i> <sub>V4</sub>   | -        | 0.33 ± 0.011                                            | 95 ( <i>R</i> ) | 1    |
| 2     | <i>SmCR</i> <sub>M1</sub>   | E23K     | 0.635 ± 0.007                                           | 93 ( <i>R</i> ) | 1.9  |
| 3     | <i>SmCR</i> <sub>M1-1</sub> | K127E    | 0.538 ± 0.016                                           | 93 ( <i>R</i> ) | 1.6  |

<sup>a</sup> Specific activity was determined spectrophotometrically at 40°C in sodium phosphate buffer (100 mM, pH 6.0) containing 4 mM substrate, 0.1 mM NADPH and a proper amount of purified enzymes.

**Table S2.** X-ray data collection and refinement statistic of *SmCR<sub>V4</sub>*

|                                       |                                     | <i>SmCR<sub>V4</sub></i> |
|---------------------------------------|-------------------------------------|--------------------------|
| PDB code                              |                                     | 7EMG                     |
| Space group                           |                                     | C222 <sub>1</sub>        |
| Cell dimens                           |                                     |                          |
|                                       | a, b, c (Å)                         | 63.8, 120.3, 120.7       |
|                                       | $\alpha$ , $\beta$ , $\gamma$ (deg) | 90, 90, 90               |
| Resolution range (Å)                  |                                     | 41.2–2.5                 |
| Highest resolution shell (Å)          |                                     | 2.49–2.45                |
| $R_{\text{merge}}$ (%)                |                                     | 17.0 (9.4/90)            |
| $I/\sigma(I)$                         |                                     | 15.0 (4.1/1.0)           |
| No. of unique reflections             |                                     | 17156 (849)              |
| Completeness (%)                      |                                     | 99.2                     |
| Redundancy                            |                                     | 12.8                     |
| <b>Refinement</b>                     |                                     |                          |
| Resolution (Å)                        |                                     | 2.45                     |
| $R_{\text{work}}/R_{\text{free}}$ (%) |                                     | 18.7/24.9                |
| No. of water molecules                |                                     | 61                       |
| B factors                             |                                     |                          |
|                                       | protein (Å <sup>2</sup> )           | 36.0                     |
|                                       | NDP (Å <sup>2</sup> )               | 56.7                     |
|                                       | water (Å <sup>2</sup> )             | 31.8                     |
| RMS deviations                        |                                     |                          |
|                                       | bond lengths (Å)                    | 0.016                    |
|                                       | bond angles (deg)                   | 1.01                     |
| Ramachandran plot                     |                                     |                          |
|                                       | favored (%)                         | 95.3                     |
|                                       | allowed (%)                         | 4.7                      |
|                                       | outliers (%)                        | 0                        |

**Table S3.** Beneficial variants obtained by site-saturation mutagenesis

| Entry | Enzyme                      | Variants | Specific activity<br>(U mg <sup>-1</sup> ) <sup>a</sup> | <i>ee</i> (%)   | Fold |
|-------|-----------------------------|----------|---------------------------------------------------------|-----------------|------|
| 1     | <i>SmCR</i> <sub>V4</sub>   | -        | 0.33 ± 0.011                                            | 95 ( <i>R</i> ) | 1    |
| 2     | <i>SmCR</i> <sub>M2</sub>   | N145R    | 1.16 ± 0.013                                            | 98 ( <i>R</i> ) | 3.5  |
| 3     | <i>SmCR</i> <sub>M2-1</sub> | K61V     | 1.16 ± 0.029                                            | 99 ( <i>R</i> ) | 3.5  |

<sup>a</sup> Specific activity was determined spectrophotometrically at 40°C in sodium phosphate buffer (100 mM, pH 6.0) containing 4 mM substrate, 0.1 mM NADPH and a proper amount of purified enzymes.



**Table S4.** Comparison of iterative combination variants

| Entry | Enzyme                      | Variants                  | Specific activity<br>(U mg <sup>-1</sup> ) <sup>a</sup> | ee (%)          | Fold |
|-------|-----------------------------|---------------------------|---------------------------------------------------------|-----------------|------|
| 1     | <i>SmCR</i> <sub>V4</sub>   | -                         | 0.33 ± 0.011                                            | 95 ( <i>R</i> ) | 1    |
| 2     | <i>SmCR</i> <sub>M3-1</sub> | N145R/E23K                | 1.66 ± 0.076                                            | 99 ( <i>R</i> ) | 5.1  |
| 3     | <i>SmCR</i> <sub>M3-2</sub> | N145/K127E                | 1.44 ± 0.012                                            | 99 ( <i>R</i> ) | 4.4  |
| 4     | <i>SmCR</i> <sub>M3-3</sub> | N145R/E23K/K127E          | 1.83 ± 0.077                                            | 99 ( <i>R</i> ) | 5.6  |
| 5     | <i>SmCR</i> <sub>M3</sub>   | E23K/K61V/K127E/<br>N145R | 1.94 ± 0.12                                             | 99 ( <i>R</i> ) | 5.9  |

<sup>a</sup> Specific activity was determined spectrophotometrically at 40°C in sodium phosphate buffer (100 mM, pH 6.0) containing 4 mM substrate, 0.1 mM NADPH and a proper amount of purified enzymes.

**Table S5.** Beneficial variants obtained in the second round of random mutagenesis

| Entry | Enzyme                      | Variants                         | Specific activity<br>(U mg <sup>-1</sup> ) <sup>a</sup> | ee (%) | Fold |
|-------|-----------------------------|----------------------------------|---------------------------------------------------------|--------|------|
| 1     | <i>SmCR</i> <sub>V4</sub>   | -                                | 0.33 ± 0.011                                            | 95 (R) | 1    |
| 2     | <i>SmCR</i> <sub>M4</sub>   | <i>SmCR</i> <sub>M3</sub> -A149T | 3.85 ± 0.28                                             | 99 (R) | 11.7 |
| 3     | <i>SmCR</i> <sub>M4-1</sub> | <i>SmCR</i> <sub>M3</sub> -L107I | 2.08 ± 0.086                                            | 99 (R) | 6.3  |
| 4     | <i>SmCR</i> <sub>M4-2</sub> | <i>SmCR</i> <sub>M3</sub> -E104K | 2.53 ± 0.07                                             | 99 (R) | 7.7  |

<sup>a</sup> Specific activity was determined spectrophotometrically at 40°C in sodium phosphate buffer (100 mM, pH 6.0) containing 4 mM substrate, 0.1 mM NADPH and a proper amount of purified enzymes.

**Table S6.** Comparison of iterative combination variants

| Entry | Enzyme                      | Variants                               | Specific activity<br>(U mg <sup>-1</sup> ) <sup>a</sup> | ee (%)          | Fold |
|-------|-----------------------------|----------------------------------------|---------------------------------------------------------|-----------------|------|
| 1     | <i>SmCR</i> <sub>V4</sub>   | -                                      | 0.33 ± 0.011                                            | 95 ( <i>R</i> ) | 1    |
| 2     | <i>SmCR</i> <sub>M5</sub>   | <i>SmCR</i> <sub>M4</sub> -E104K       | 4.55 ± 0.23                                             | 99 ( <i>R</i> ) | 13.9 |
| 3     | <i>SmCR</i> <sub>M5-1</sub> | <i>SmCR</i> <sub>M4</sub> -L107I       | 3.82 ± 0.12                                             | 99 ( <i>R</i> ) | 11.6 |
| 4     | <i>SmCR</i> <sub>M5-2</sub> | <i>SmCR</i> <sub>M4</sub> -E104K/L107I | 4.18 ± 0.11                                             | 99 ( <i>R</i> ) | 12.7 |

<sup>a</sup> Specific activity was determined spectrophotometrically at 40°C in sodium phosphate buffer (100 mM, pH 6.0) containing 4 mM substrate, 0.1 mM NADPH and a proper amount of purified enzymes.

**Table S7.** The half-life of different variants at different temperatures

| Enzyme                                   | 30°C         |             | 40°C         |             | 50°C           |               |
|------------------------------------------|--------------|-------------|--------------|-------------|----------------|---------------|
|                                          | $k_d/h^{-1}$ | $t_{1/2}/h$ | $k_d/h^{-1}$ | $t_{1/2}/h$ | $k_d/min^{-1}$ | $t_{1/2}/min$ |
| <i>SmCR</i> <sub>M5</sub>                | 0.0041       | 170         | 0.0085       | 81          | 0.0704         | 9.8           |
| <i>SmCR</i> <sub>M4</sub>                | 0.0034       | 202         | 0.0143       | 48          | 0.1326         | 5.2           |
| <i>SmCR</i> <sub>M3</sub>                | 0.0029       | 239         | 0.0132       | 53          | 0.1026         | 6.5           |
| <i>SmCR</i> <sub>M0</sub> <sup>[6]</sup> | 0.0056       | 124         | 0.0096       | 72          | 0.0048         | 144           |

**Table S8.** GC conditions used to determine the enantioselectivity of corresponding products

| Entry | Product                                                                             | Method                              | Retention time (min) |          |
|-------|-------------------------------------------------------------------------------------|-------------------------------------|----------------------|----------|
|       |                                                                                     |                                     | <i>R</i>             | <i>S</i> |
| 1     | 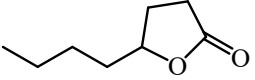   | 100/8/2/120/5/2/130/1               | 23.48                | 24.13    |
| 2     |    | 110/0/1.5/120/5/0.8/130/10          | 23.09                | 23.73    |
| 3     |    | 110/0/2/140/10                      | 22.77                | 23.19    |
| 4     |    | 90/1/4/130/3/1/150/5                | 35.39                | 35.79    |
| 5     |   | 140/50                              | 38.83                | 39.74    |
| 6     |  | 110/40                              | 29.04                | 28.12    |
| 7     |  | 110/60                              | 50.25                | 49.01    |
| 8     |  | 80/10/1/100/30/0.5/130/10/10/180/10 | 116.7<br>4           | 116.0    |
| 9     |  | 130/60                              | 47.33                | 46.53    |
| 10    |  | 135/70                              | 59.41                | 58.52    |
| 11    |  | 110/0/3/140/10/2/170/5              | 37.04                | 36.56    |
| 12    |  | 110/1/10/160/5/10/180/25            | 32.09                | 32.95    |
| 13    |  | 110/1/10/160/5/10/180/20            | 26.69                | 26.39    |

<sup>a</sup> GC program: initial temp. (°C)/ time (min)/ slope (°C/min)/ temp. (°C)/ time (min)/ slope (°C/min)/ final temp. (°C)/ time (min).

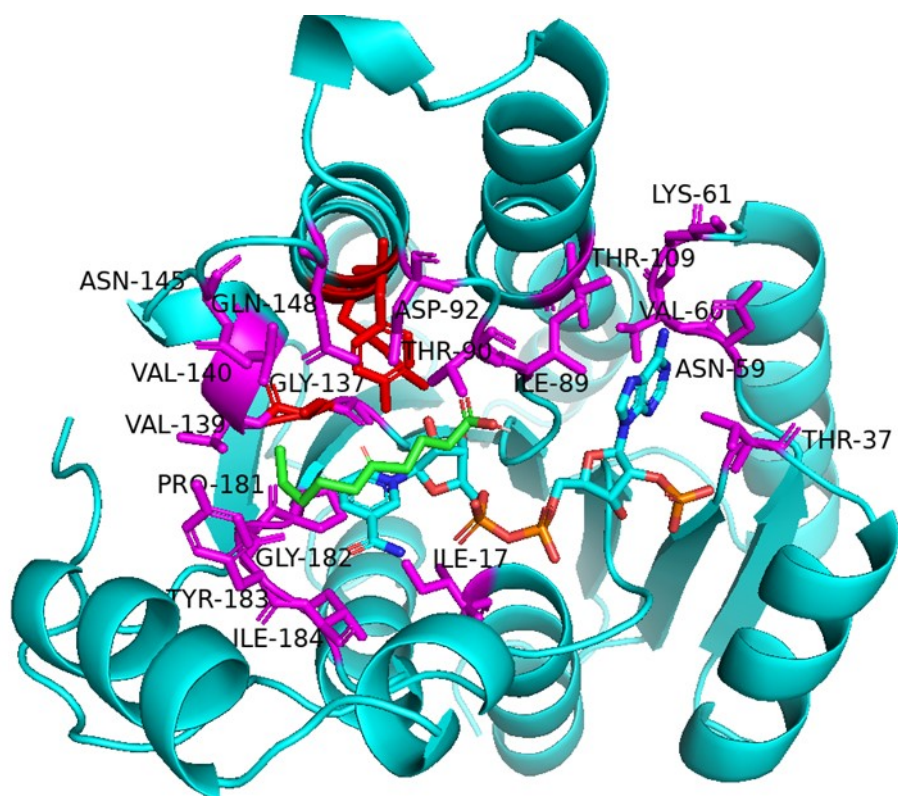

**Figure S1.** Structure model of *SmCR*<sub>v4</sub>. 18 Amino acid residues (in pink) were selected for site-saturation mutagenesis.

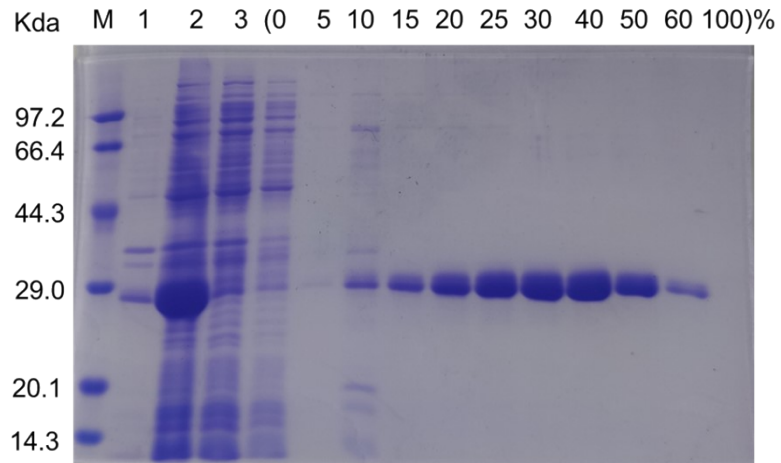

**Figure S2.** SDS-PAGE of pure *SmCR<sub>M5</sub>* by nickel ion affinity chromatography. M: Protein standard marker; line 1: precipitant of cell lysate; line 2: supernatant of cell lysate; line 3: flow-through of protein; other line: elution conditions with different volume ratio (buffer B: buffer A+B).

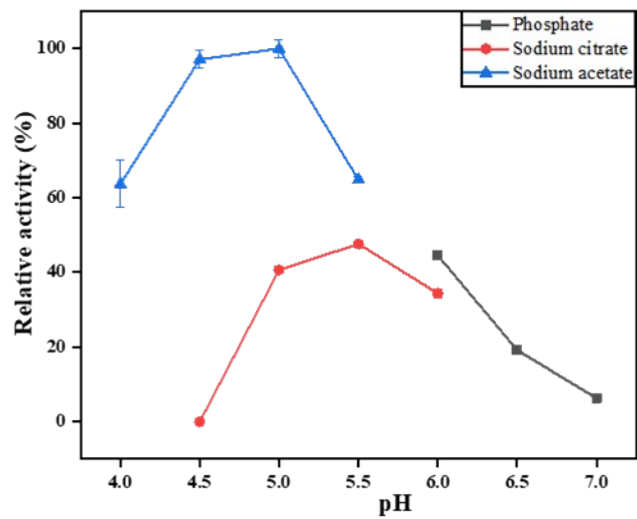

**Figure S3.** Effect of pH on the activity of purified *SmCR*<sub>M5</sub>. Error bars (standard deviation) were obtained from triplicate experiments at each point.



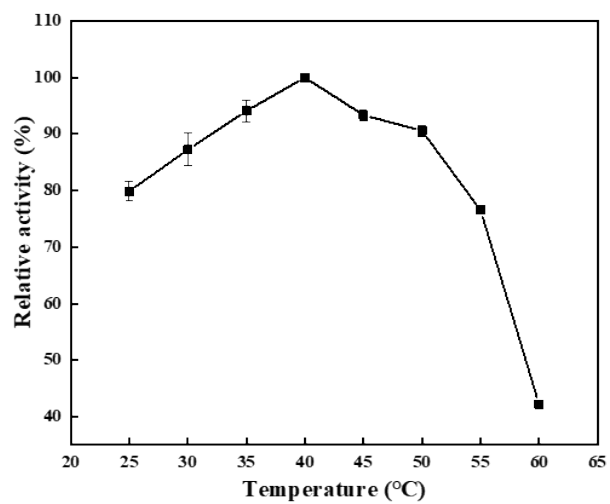

**Figure S4.** Effect of temperature on the activity of purified *SmCR*<sub>M5</sub>. Error bars (standard deviation) were obtained from triplicate experiments at each point.

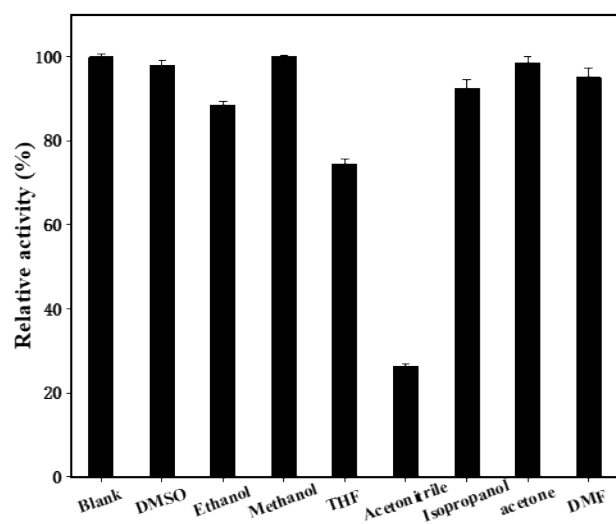

**Figure S5.** Effect of organic solvents on the activity of purified *SmCR*<sub>M5</sub>. Error bars (standard deviation) were obtained from triplicate experiments at each point.

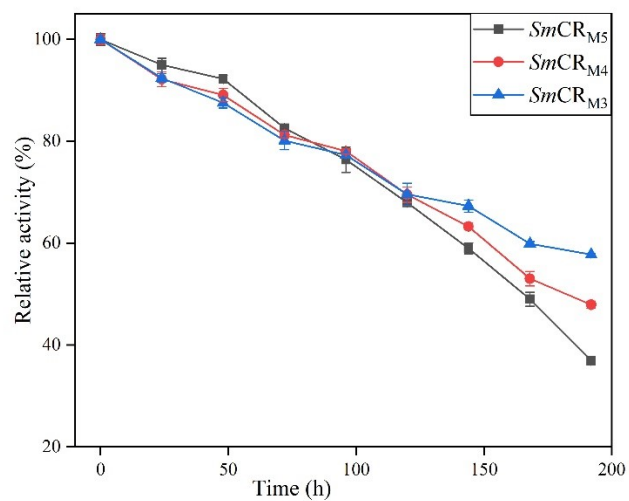

**Figure S6.** Thermostability of purified  $SmCR_{M5}$ ,  $SmCR_{M4}$  and  $SmCR_{M3}$  at 30°C. Error bars (standard deviation) were obtained from triplicate experiments at each point.

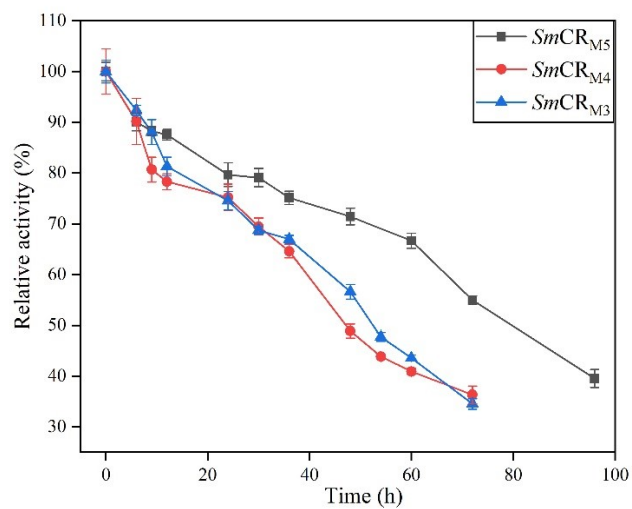

**Figure S7.** Thermostability of purified *SmCR*<sub>M5</sub>, *SmCR*<sub>M4</sub> and *SmCR*<sub>M3</sub> at 40°C. Error bars (standard deviation) were obtained from triplicate experiments at each point.

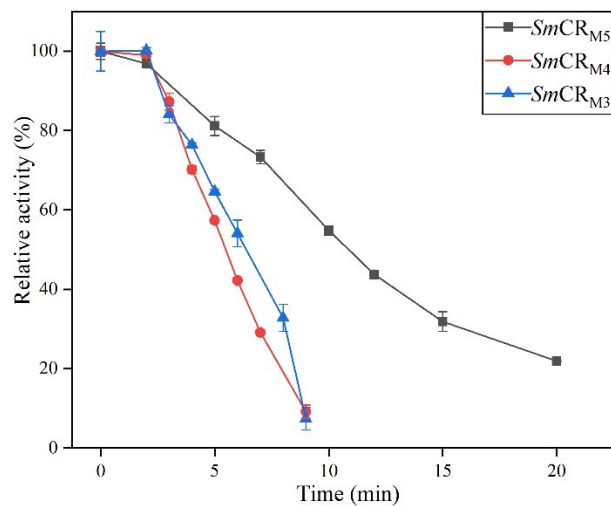

**Figure S8.** Thermostability of purified  $SmCR_{M5}$ ,  $SmCR_{M4}$  and  $SmCR_{M3}$  at 50°C. Error bars (standard deviation) were obtained from triplicate experiments at each point.

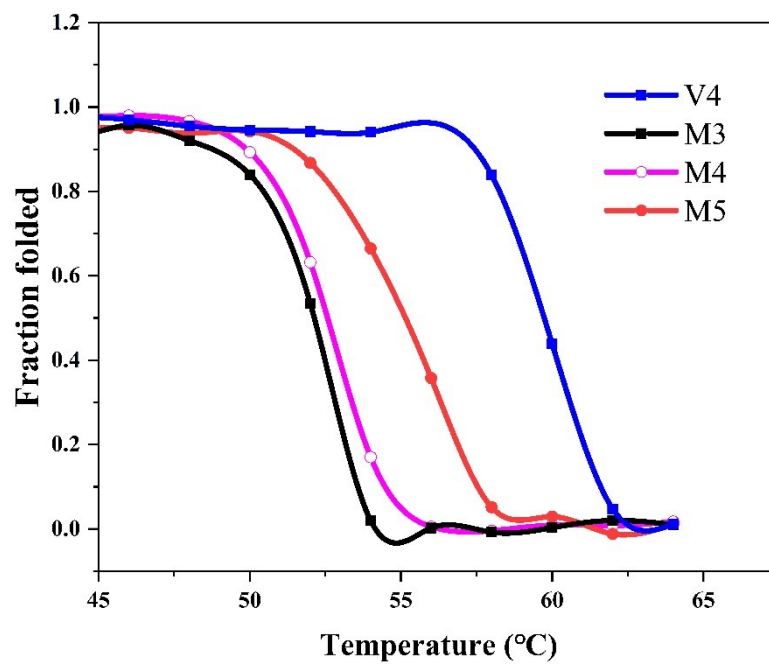

**Figure S9.** Thermal unfolding curves of V4 and variants analyzed by circular dichroism spectroscopy.

| Enzyme                    | $T_m$ (°C) |
|---------------------------|------------|
| <i>SmCR</i> <sub>V4</sub> | 59.8       |
| <i>SmCR</i> <sub>M3</sub> | 52.1       |
| <i>SmCR</i> <sub>M4</sub> | 52.6       |
| <i>SmCR</i> <sub>M5</sub> | 55.2       |

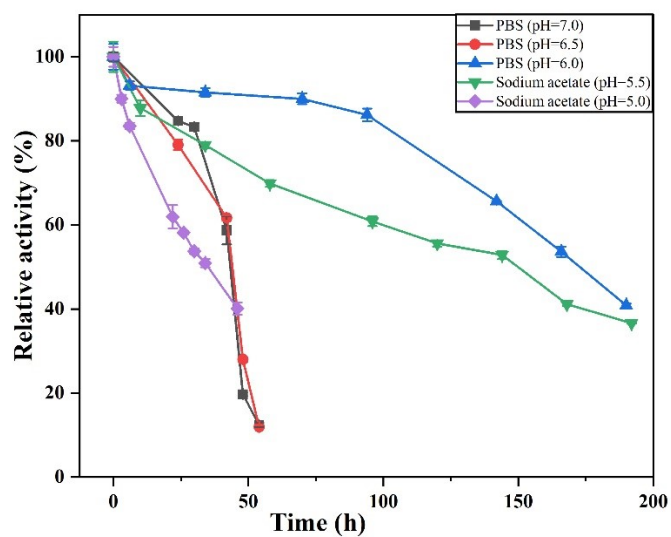

**Figure S10.** Thermostability of purified  $SmCR_{M5}$  at different buffers. Error bars (standard deviation) were obtained from triplicate experiments at each point.

### 3. Chiral GC data of enantiopure lactones

Reduction of **1a** with NaBH<sub>4</sub>

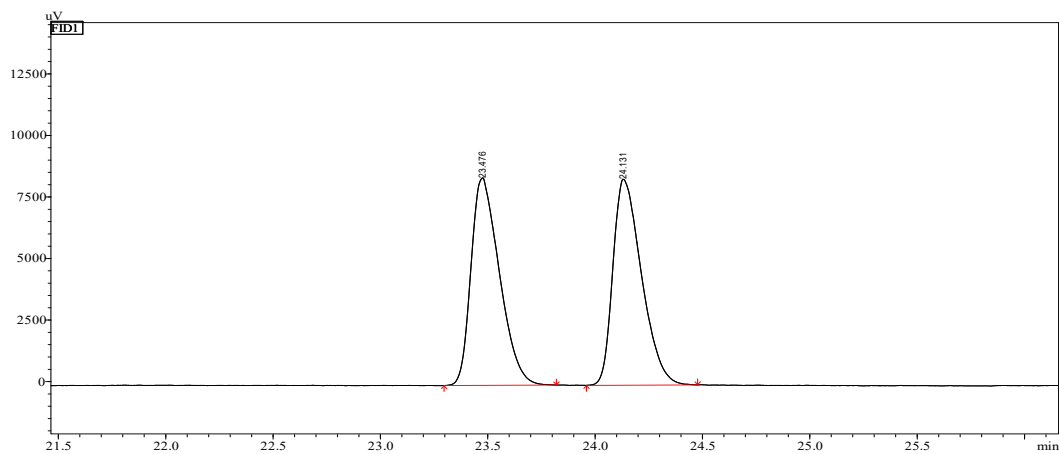

| Peak # | Ret. Time (min) | Area (μV*s) | Area% |
|--------|-----------------|-------------|-------|
| 1      | 23.476          | 77493       | 50.0  |
| 2      | 24.131          | 77555       | 50.0  |

Bioreduction of **1a** with SmCR<sub>M5</sub>

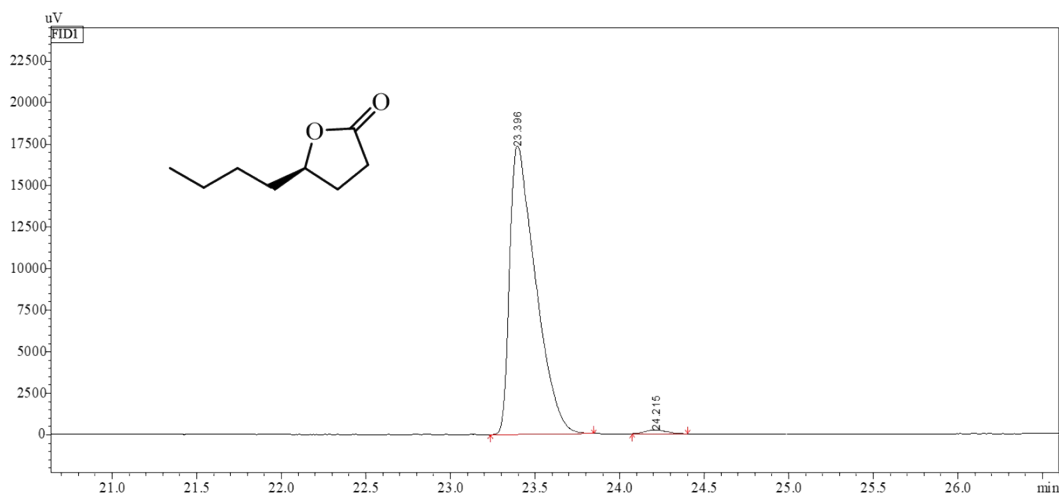

| Peak # | Ret. Time (min) | Area (μV*s) | Area% |
|--------|-----------------|-------------|-------|
| 1      | 23.396          | 184995      | 98.9  |
| 2      | 24.215          | 2006        | 1.1   |



### Reduction of **1b** with NaBH<sub>4</sub>

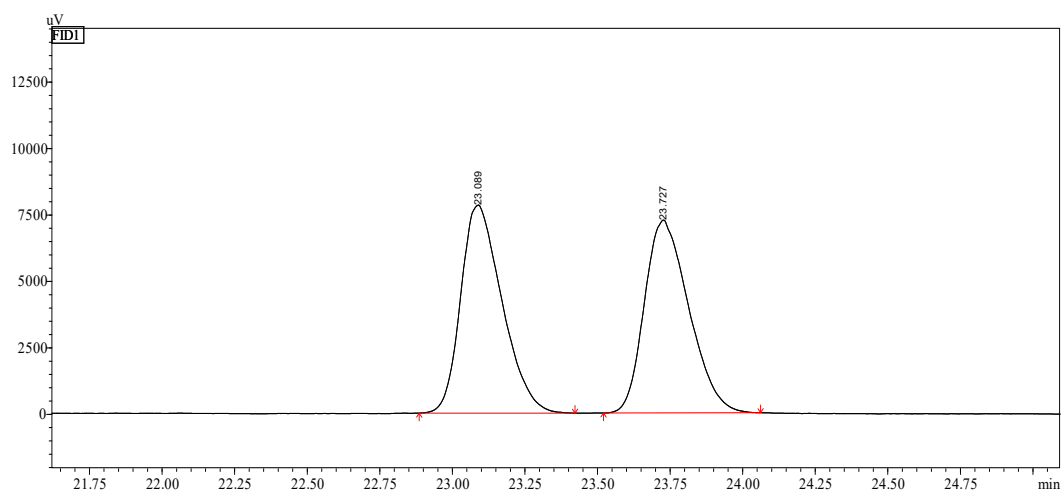

| Peak # | Ret. Time (min) | Area (μV*s) | Area% |
|--------|-----------------|-------------|-------|
| 1      | 23.089          | 77523       | 50.1  |
| 2      | 23.727          | 77107       | 49.9  |

### Bioreduction of **1b** with *SmCR*<sub>M5</sub>

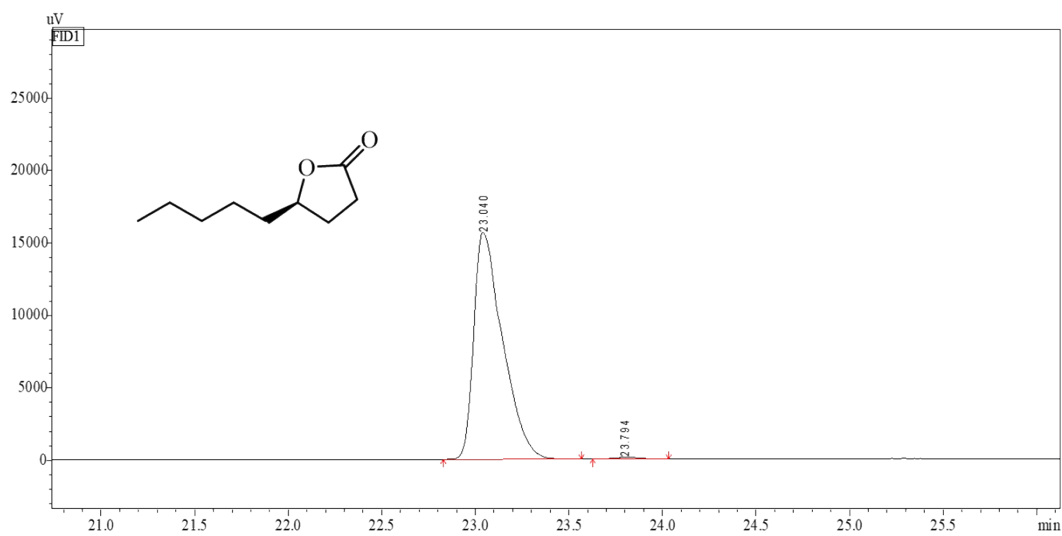

| Peak # | Ret. Time (min) | Area (μV*s) | Area% |
|--------|-----------------|-------------|-------|
| 1      | 23.04           | 167850      | 99.3  |
| 2      | 23.794          | 1190        | 0.7   |

### Racemic $\gamma$ -decalactone

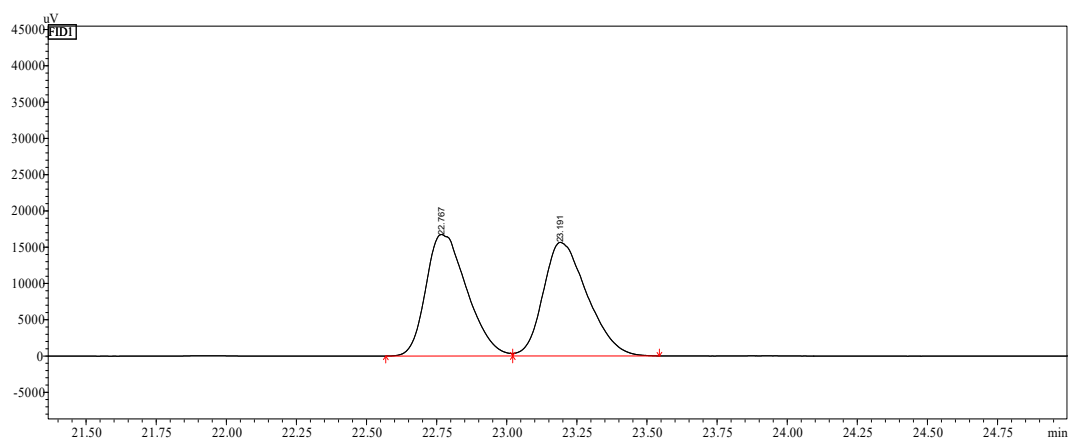

| Peak # | Ret. Time (min) | Area ( $\mu\text{V}\cdot\text{s}$ ) | Area% |
|--------|-----------------|-------------------------------------|-------|
| 1      | 22.767          | 170564                              | 49.9  |
| 2      | 23.191          | 170934                              | 50.1  |

### Bioreduction of **1c** with $\text{SmCR}_{\text{M5}}$

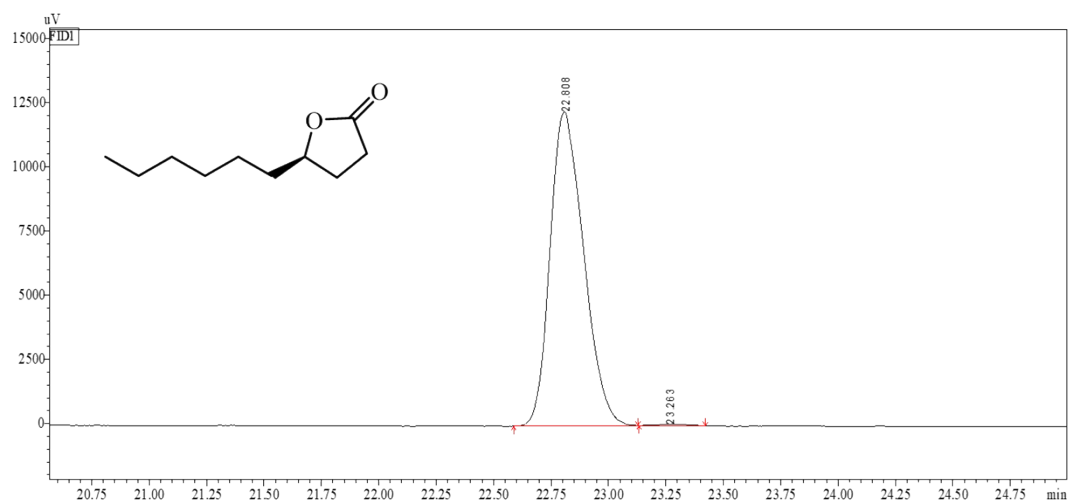

| Peak # | Ret. Time (min) | Area ( $\mu\text{V}\cdot\text{s}$ ) | Area% |
|--------|-----------------|-------------------------------------|-------|
| 1      | 22.808          | 124332                              | 99.5  |
| 2      | 23.263          | 620                                 | 0.5   |

# Bioreduction of **1k** with *SmCR*<sub>M5</sub>

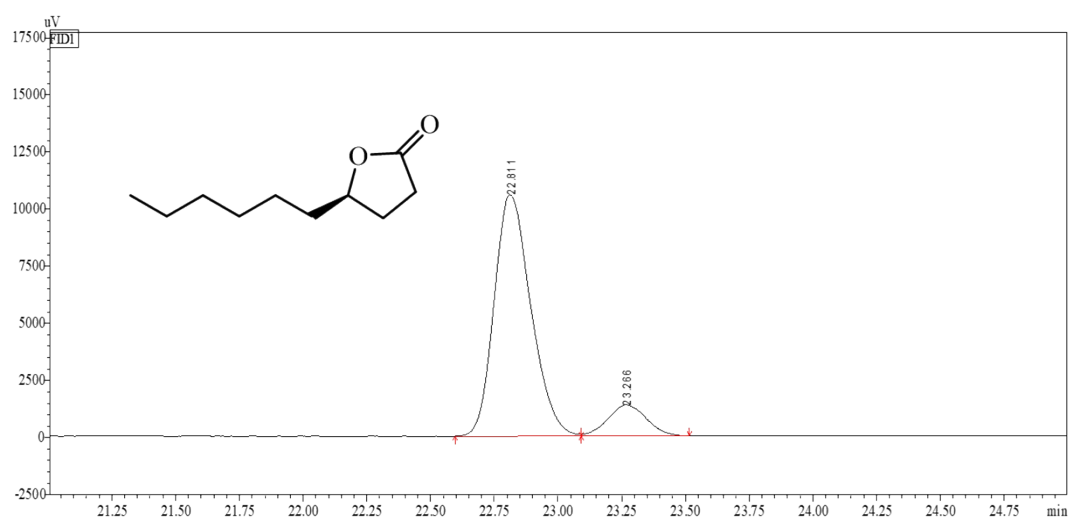

| Peak # | Ret. Time (min) | Area ( $\mu\text{V}\cdot\text{s}$ ) | Area% |
|--------|-----------------|-------------------------------------|-------|
| 1      | 22.811          | 105674                              | 88.2  |
| 2      | 23.266          | 14136                               | 11.8  |

### Reduction of **1d** with NaBH<sub>4</sub>

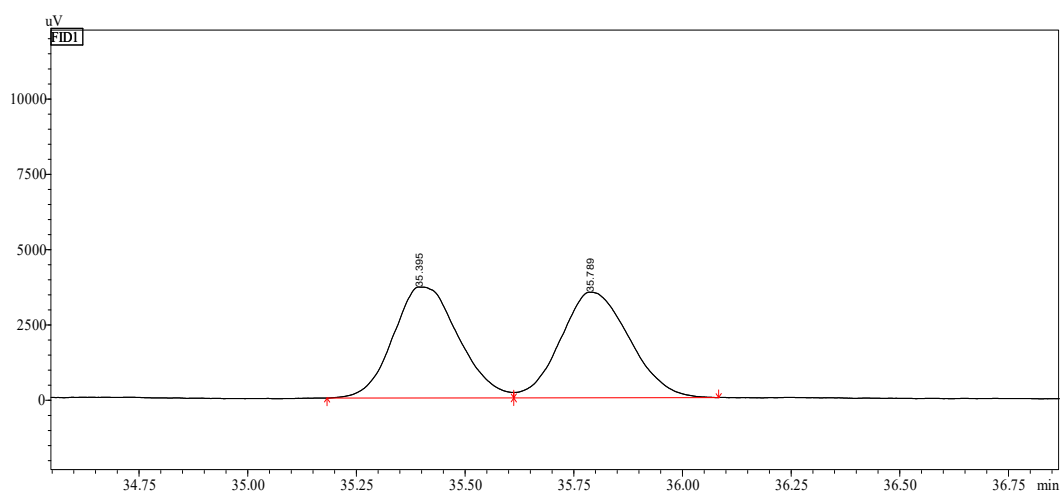

| Peak # | Ret. Time (min) | Area (μV*s) | Area% |
|--------|-----------------|-------------|-------|
| 1      | 35.395          | 38606       | 50.0  |
| 2      | 35.789          | 38639       | 50.0  |

### Bioreduction of **1d** with *SmCR*<sub>M5</sub>

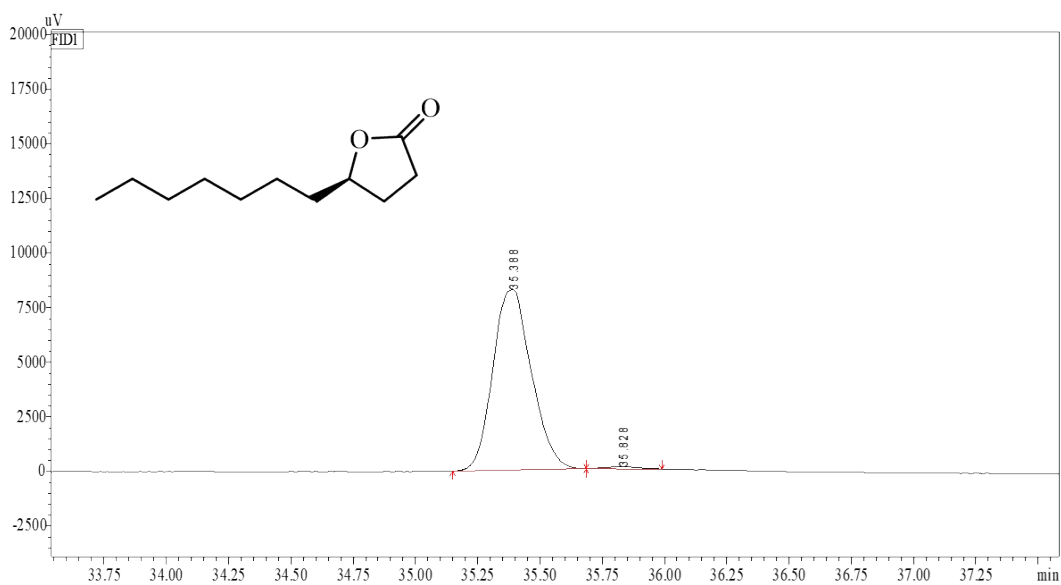

| Peak # | Ret. Time (min) | Area (μV*s) | Area% |
|--------|-----------------|-------------|-------|
| 1      | 35.388          | 88746       | 98.9  |
| 2      | 35.828          | 1008        | 1.1   |

### Reduction of **1e** with NaBH<sub>4</sub>

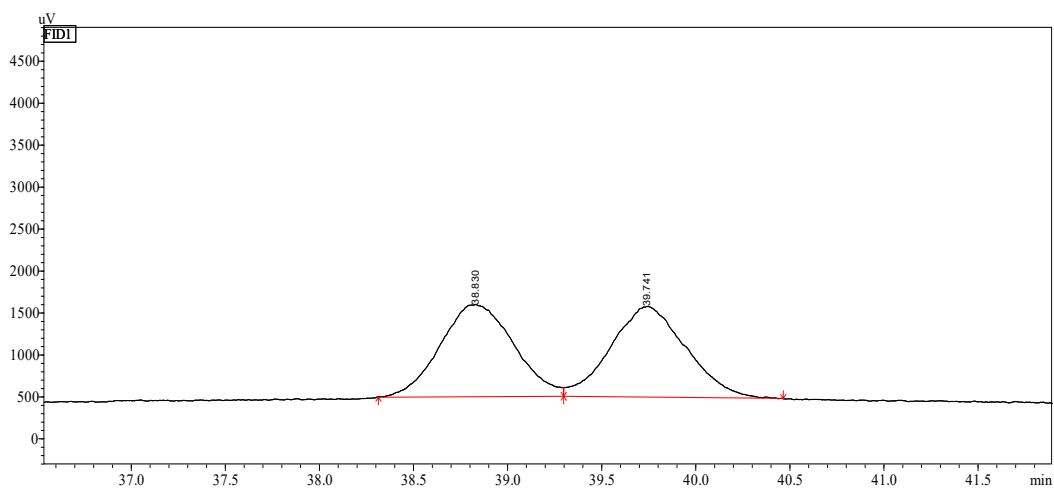

| Peak # | Ret. Time (min) | Area (μV*s) | Area% |
|--------|-----------------|-------------|-------|
| 1      | 38.83           | 29925       | 50.0  |
| 2      | 39.741          | 29893       | 50.0  |

### Bioreduction of **1e** with *SmCR*<sub>M5</sub>

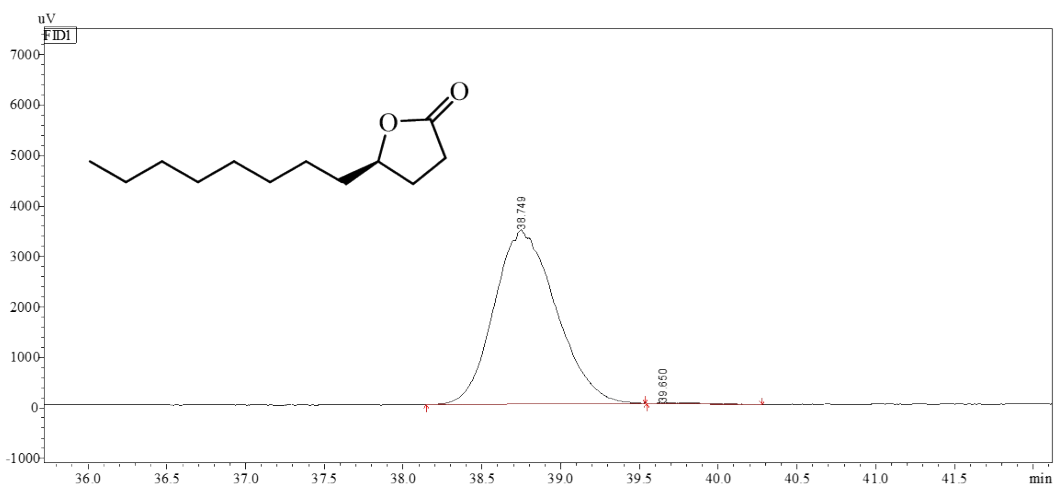

| Peak # | Ret. Time (min) | Area (μV*s) | Area% |
|--------|-----------------|-------------|-------|
| 1      | 38.749          | 94080       | 99.5  |
| 2      | 39.65           | 441         | 0.5   |

### Reduction of **1f** with NaBH<sub>4</sub>

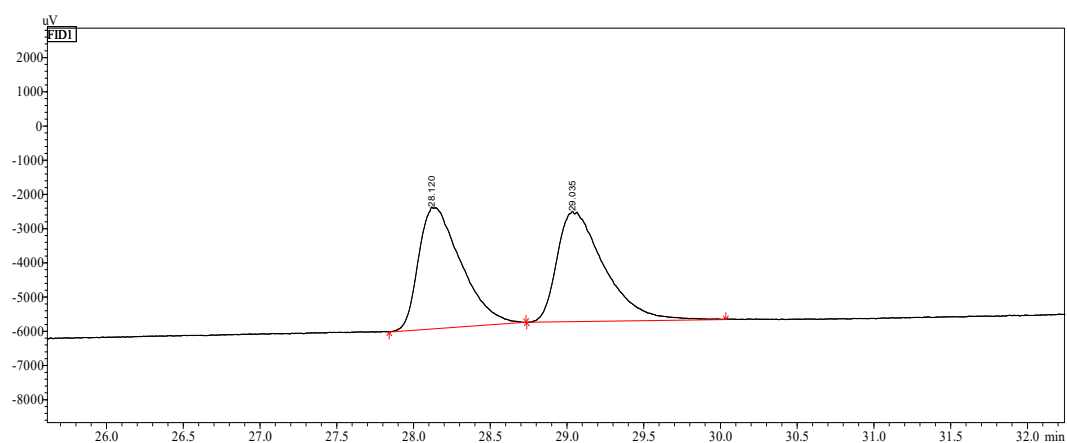

| Peak # | Ret. Time (min) | Area (μV*s) | Area% |
|--------|-----------------|-------------|-------|
| 1      | 28.12           | 68215       | 49.9  |
| 2      | 29.035          | 68621       | 50.1  |

### Bioreduction of **1f** with *SmCR*<sub>M5</sub>

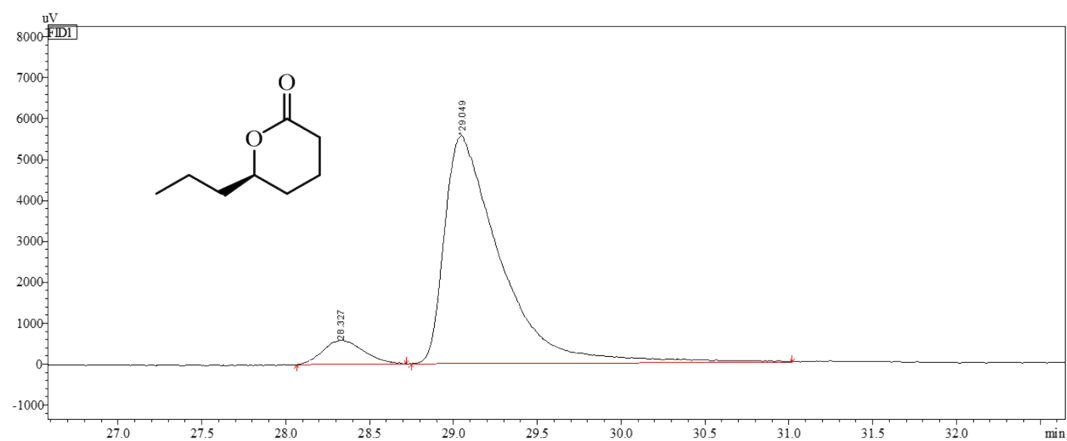

| Peak # | Ret. Time (min) | Area (μV*s) | Area% |
|--------|-----------------|-------------|-------|
| 1      | 28.327          | 9952        | 7.2   |
| 2      | 29.049          | 128551      | 92.8  |

### Reduction of **1g** with NaBH<sub>4</sub>

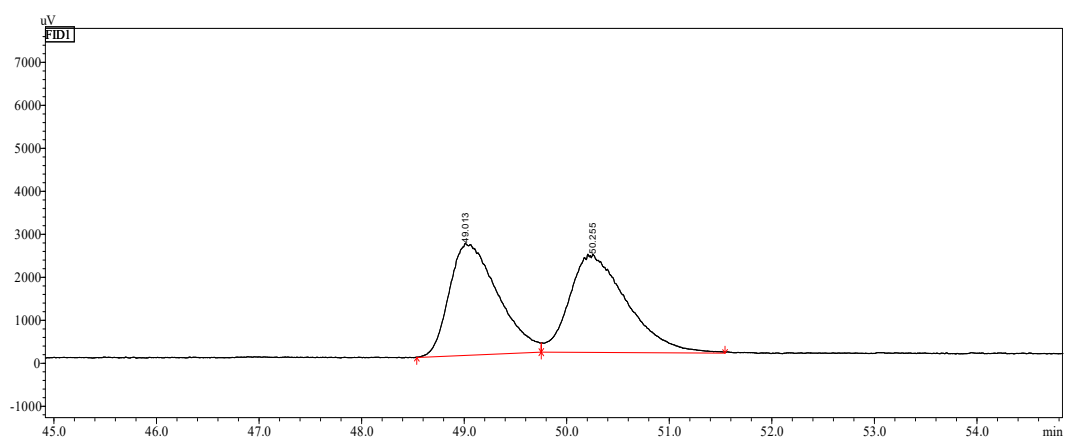

| Peak # | Ret. Time (min) | Area (μV*s) | Area% |
|--------|-----------------|-------------|-------|
| 1      | 49.013          | 85306       | 49.0  |
| 2      | 50.255          | 88742       | 51.0  |

### Bioreduction of **1g** with *SmCR*<sub>M5</sub>

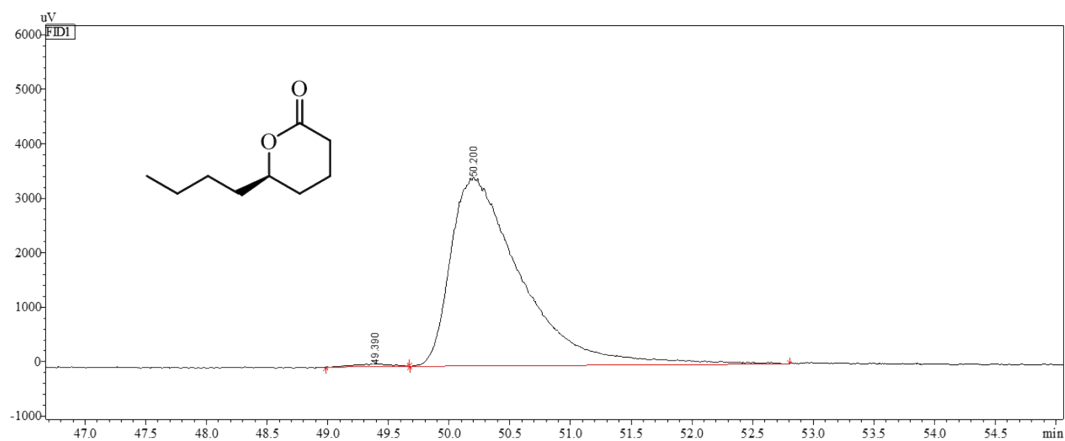

| Peak # | Ret. Time (min) | Area (μV*s) | Area% |
|--------|-----------------|-------------|-------|
| 1      | 49.39           | 1095        | 0.8   |
| 2      | 50.2            | 139894      | 99.2  |

### Racemic $\delta$ -decalactone

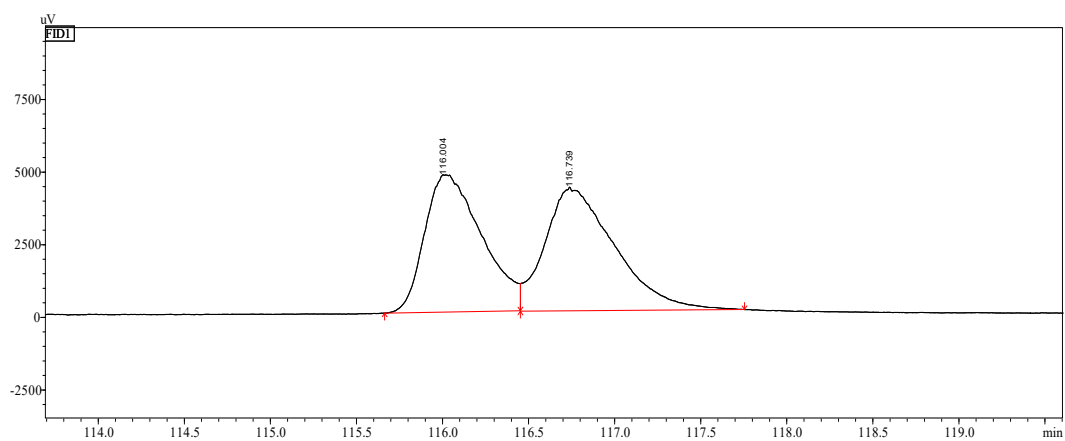

| Peak # | Ret. Time (min) | Area ( $\mu\text{V}\cdot\text{s}$ ) | Area% |
|--------|-----------------|-------------------------------------|-------|
| 1      | 116.004         | 109281                              | 47.8  |
| 2      | 116.739         | 119264                              | 52.2  |

### Bioreduction of **1h** with *SmCR*<sub>M5</sub>

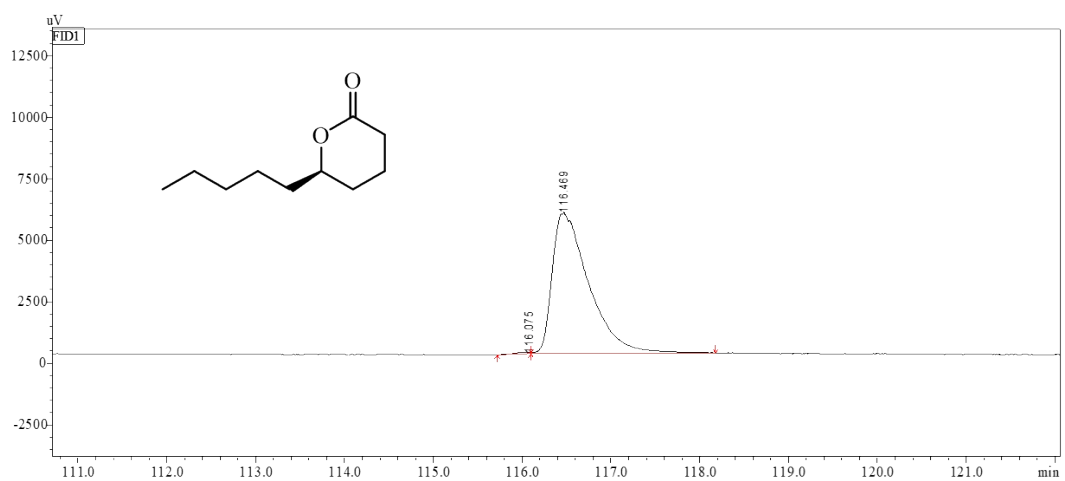

| Peak # | Ret. Time (min) | Area ( $\mu\text{V}\cdot\text{s}$ ) | Area% |
|--------|-----------------|-------------------------------------|-------|
| 1      | 116.075         | 780                                 | 0.5   |
| 2      | 116.469         | 163222                              | 99.5  |

### Bioreduction of **1l** with *SmCR*<sub>M5</sub>



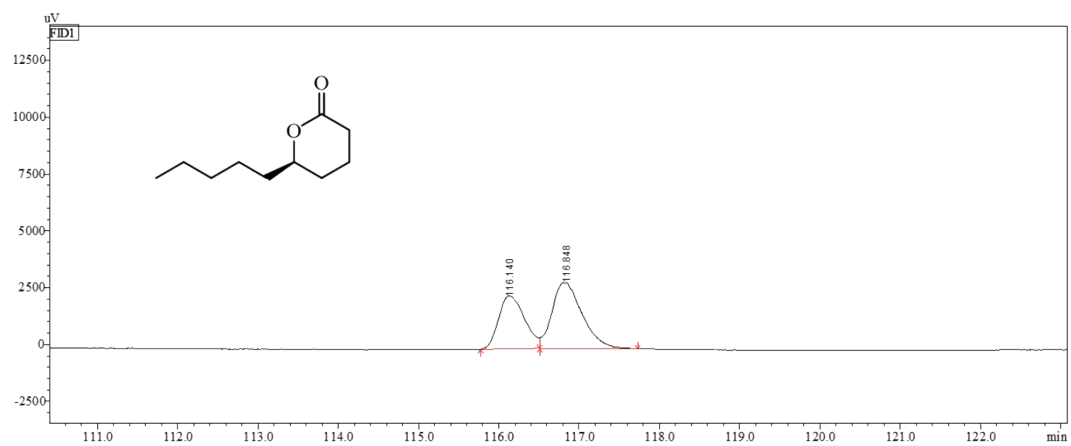

| Peak # | Ret. Time (min) | Area ( $\mu\text{V}\cdot\text{s}$ ) | Area% |
|--------|-----------------|-------------------------------------|-------|
| 1      | 116.14          | 52492                               | 40.7  |
| 2      | 116.848         | 76561                               | 59.3  |

### Reduction of **1i** with NaBH<sub>4</sub>

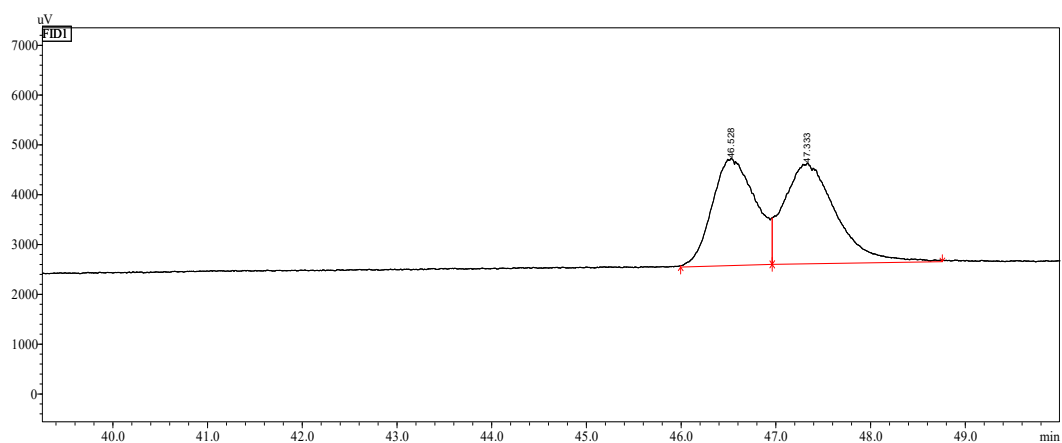

| Peak # | Ret. Time (min) | Area (μV*s) | Area% |
|--------|-----------------|-------------|-------|
| 1      | 46.528          | 66871       | 46.7  |
| 2      | 47.333          | 76214       | 53.3  |

### Bioreduction of **1i** with *SmCR*<sub>M5</sub>

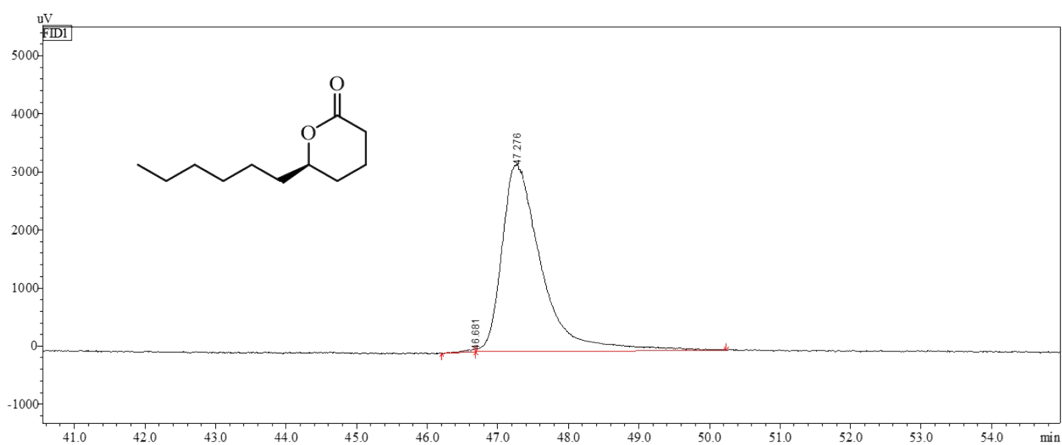

| Peak # | Ret. Time (min) | Area (μV*s) | Area% |
|--------|-----------------|-------------|-------|
| 1      | 46.681          | 587         | 0.5   |
| 2      | 47.276          | 125220      | 99.5  |

### Reduction of **1j** with NaBH<sub>4</sub>

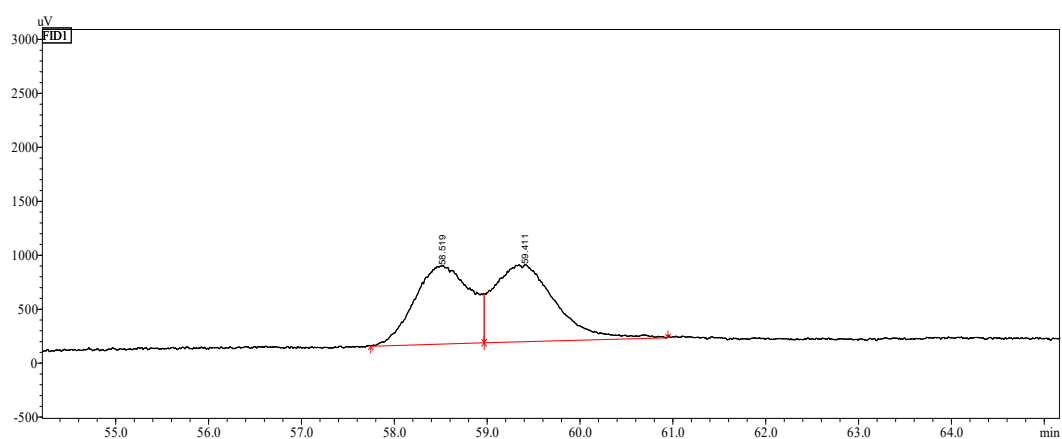

| Peak # | Ret. Time (min) | Area (μV*s) | Area% |
|--------|-----------------|-------------|-------|
| 1      | 58.519          | 30538       | 48.1  |
| 2      | 59.411          | 32890       | 51.9  |

### Bioreduction of **1j** with *SmCR*<sub>M5</sub>

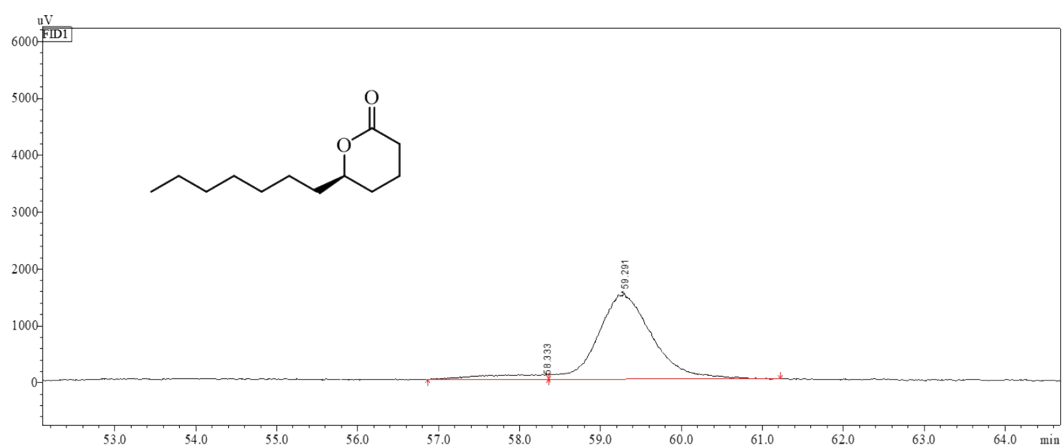

| Peak # | Ret. Time (min) | Area (μV*s) | Area% |
|--------|-----------------|-------------|-------|
| 1      | 58.149          | 3784        | 5.2   |
| 2      | 59.291          | 69191       | 94.8  |

### Reduction of **1m** with NaBH<sub>4</sub>

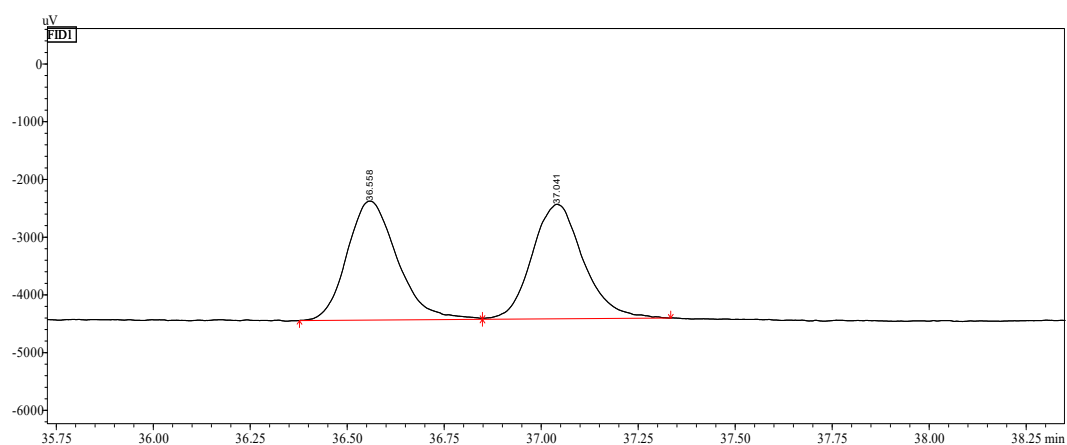

| Peak # | Ret. Time (min) | Area (μV*s) | Area% |
|--------|-----------------|-------------|-------|
| 1      | 36.558          | 18498       | 50.4  |
| 2      | 37.041          | 18237       | 49.6  |

### Bioreduction of **1m** with *SmCR*<sub>M5</sub>

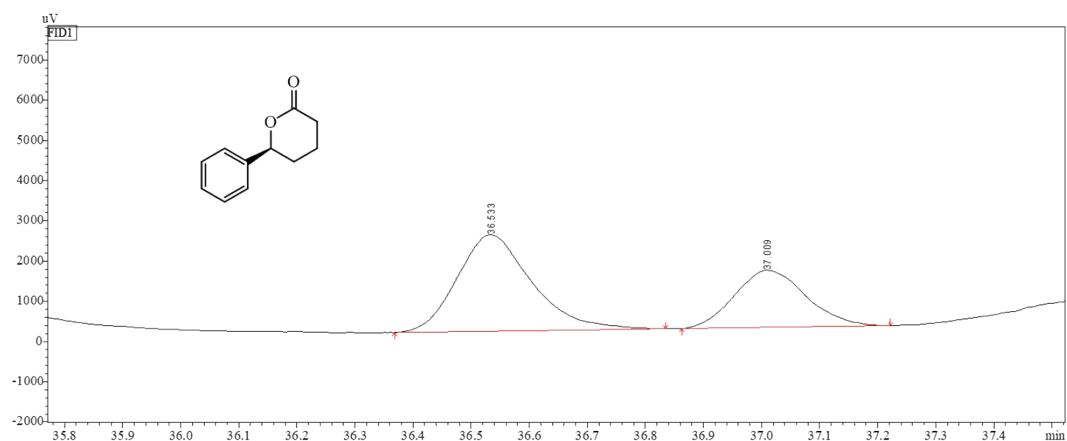

| Peak # | Ret. Time (min) | Area (μV*s) | Area% |
|--------|-----------------|-------------|-------|
| 1      | 36.533          | 21416       | 63.9  |
| 2      | 37.009          | 12084       | 36.1  |

# Bioreduction of **1n** with *SmCR*<sub>M5</sub>

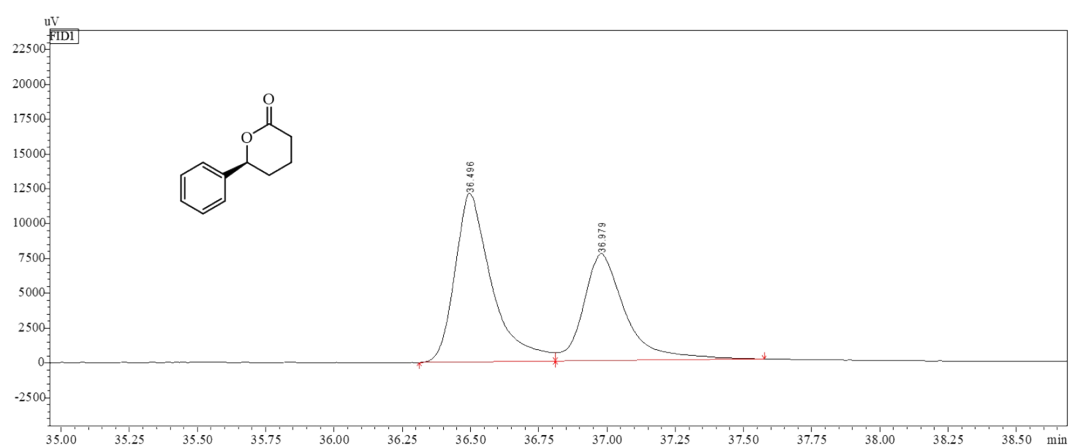

| Peak # | Ret. Time (min) | Area ( $\mu\text{V}\cdot\text{s}$ ) | Area% |
|--------|-----------------|-------------------------------------|-------|
| 1      | 36.496          | 113572                              | 58.1  |
| 2      | 36.979          | 82006                               | 41.9  |

### Reduction of **1o** with NaBH<sub>4</sub>

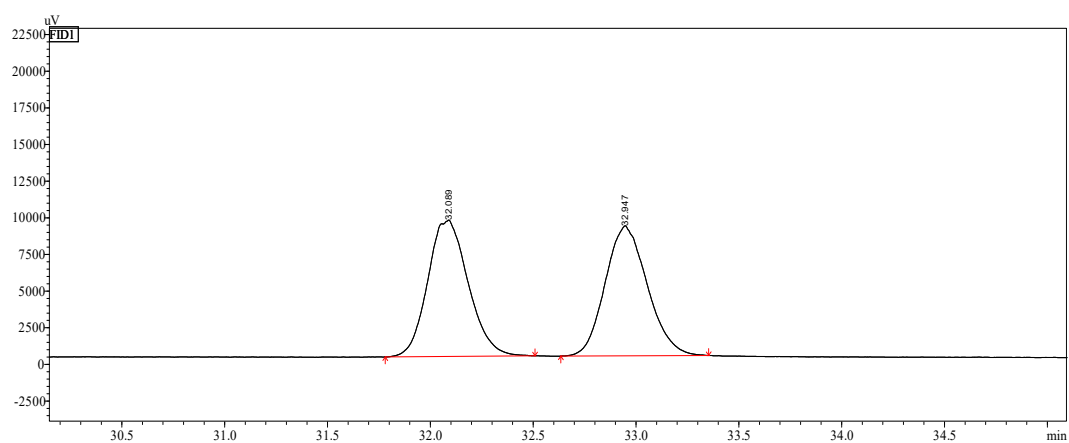

| Peak # | Ret. Time (min) | Area (μV*s) | Area% |
|--------|-----------------|-------------|-------|
| 1      | 32.089          | 127355      | 50.2  |
| 2      | 32.947          | 126253      | 49.8  |

### Bioreduction of **1o** with *SmCR*<sub>M5</sub>

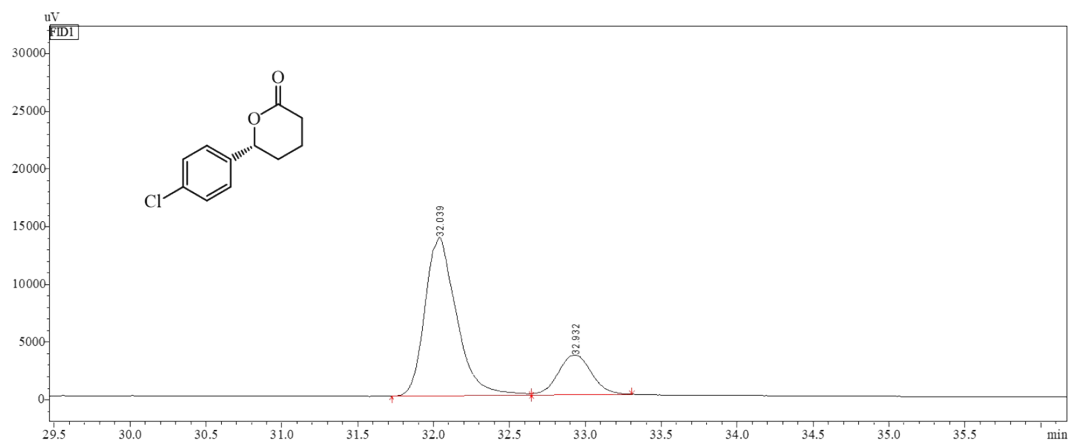

| Peak # | Ret. Time (min) | Area (μV*s) | Area% |
|--------|-----------------|-------------|-------|
| 1      | 32.039          | 198877      | 79.1  |
| 2      | 32.932          | 52569       | 20.9  |

### Reduction of **1p** with NaBH<sub>4</sub>

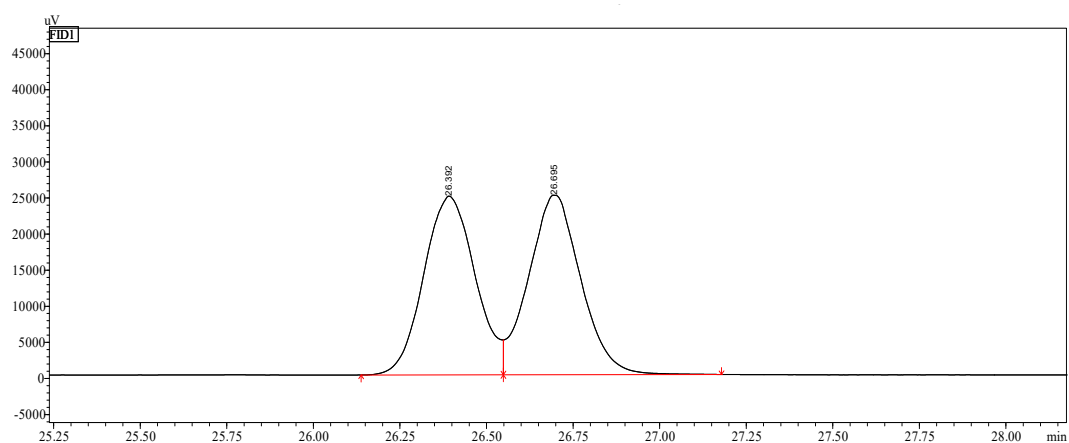

| Peak # | Ret. Time (min) | Area (μV*s) | Area% |
|--------|-----------------|-------------|-------|
| 1      | 26.392          | 255666      | 49.6  |
| 2      | 26.695          | 260165      | 50.4  |

### Bioreduction of **1p** with *SmCR*<sub>M5</sub>

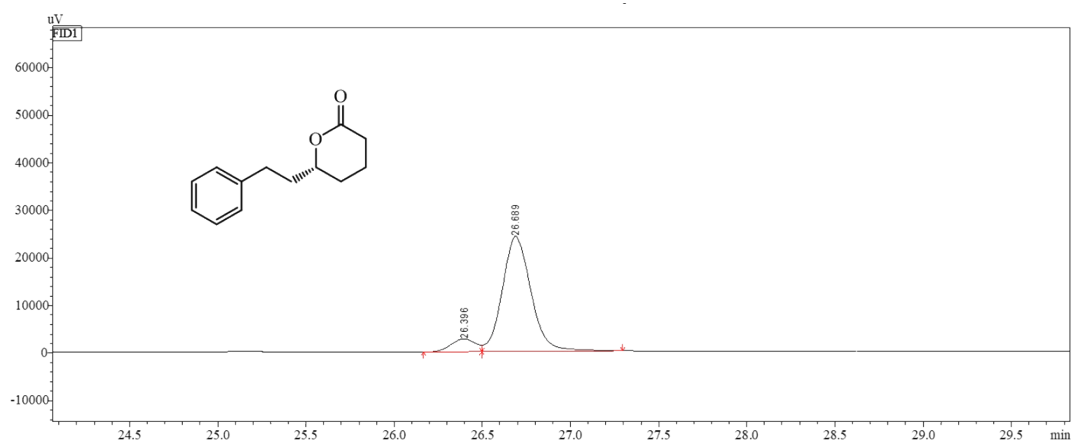

| Peak # | Ret. Time (min) | Area (μV*s) | Area% |
|--------|-----------------|-------------|-------|
| 1      | 26.396          | 26040       | 8.7   |
| 2      | 26.689          | 272691      | 91.3  |

#### 4. NMR spectra of enantiopure lactones

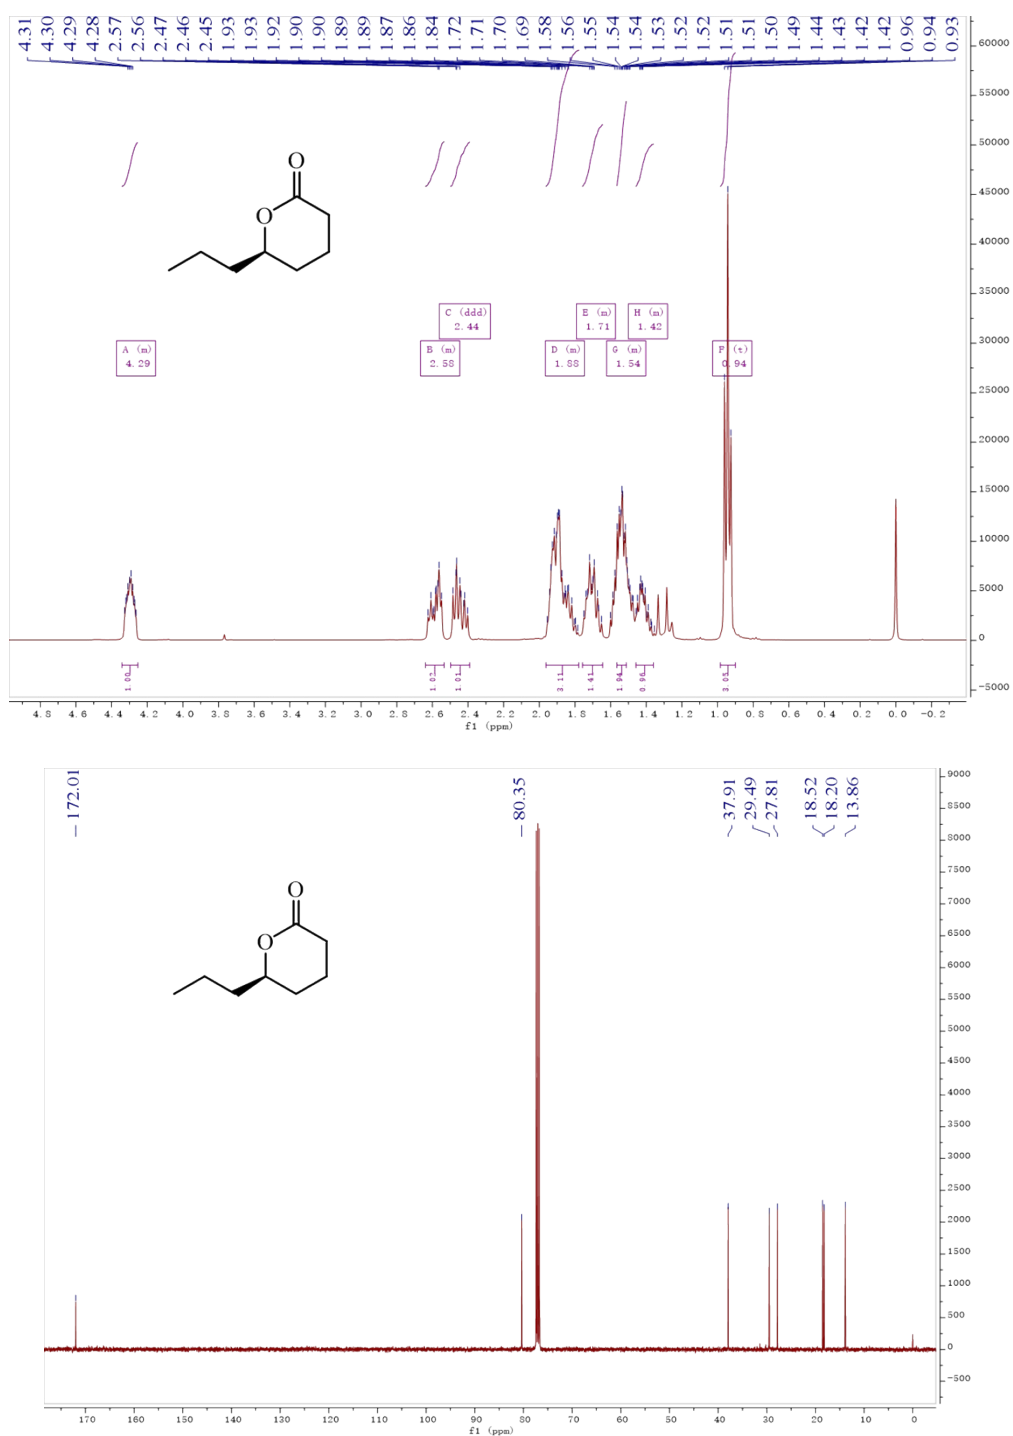

Figure S9. <sup>1</sup>H (400 MHz) and <sup>13</sup>C NMR (100 MHz) spectra of *(R)*-3f in CDCl<sub>3</sub>.



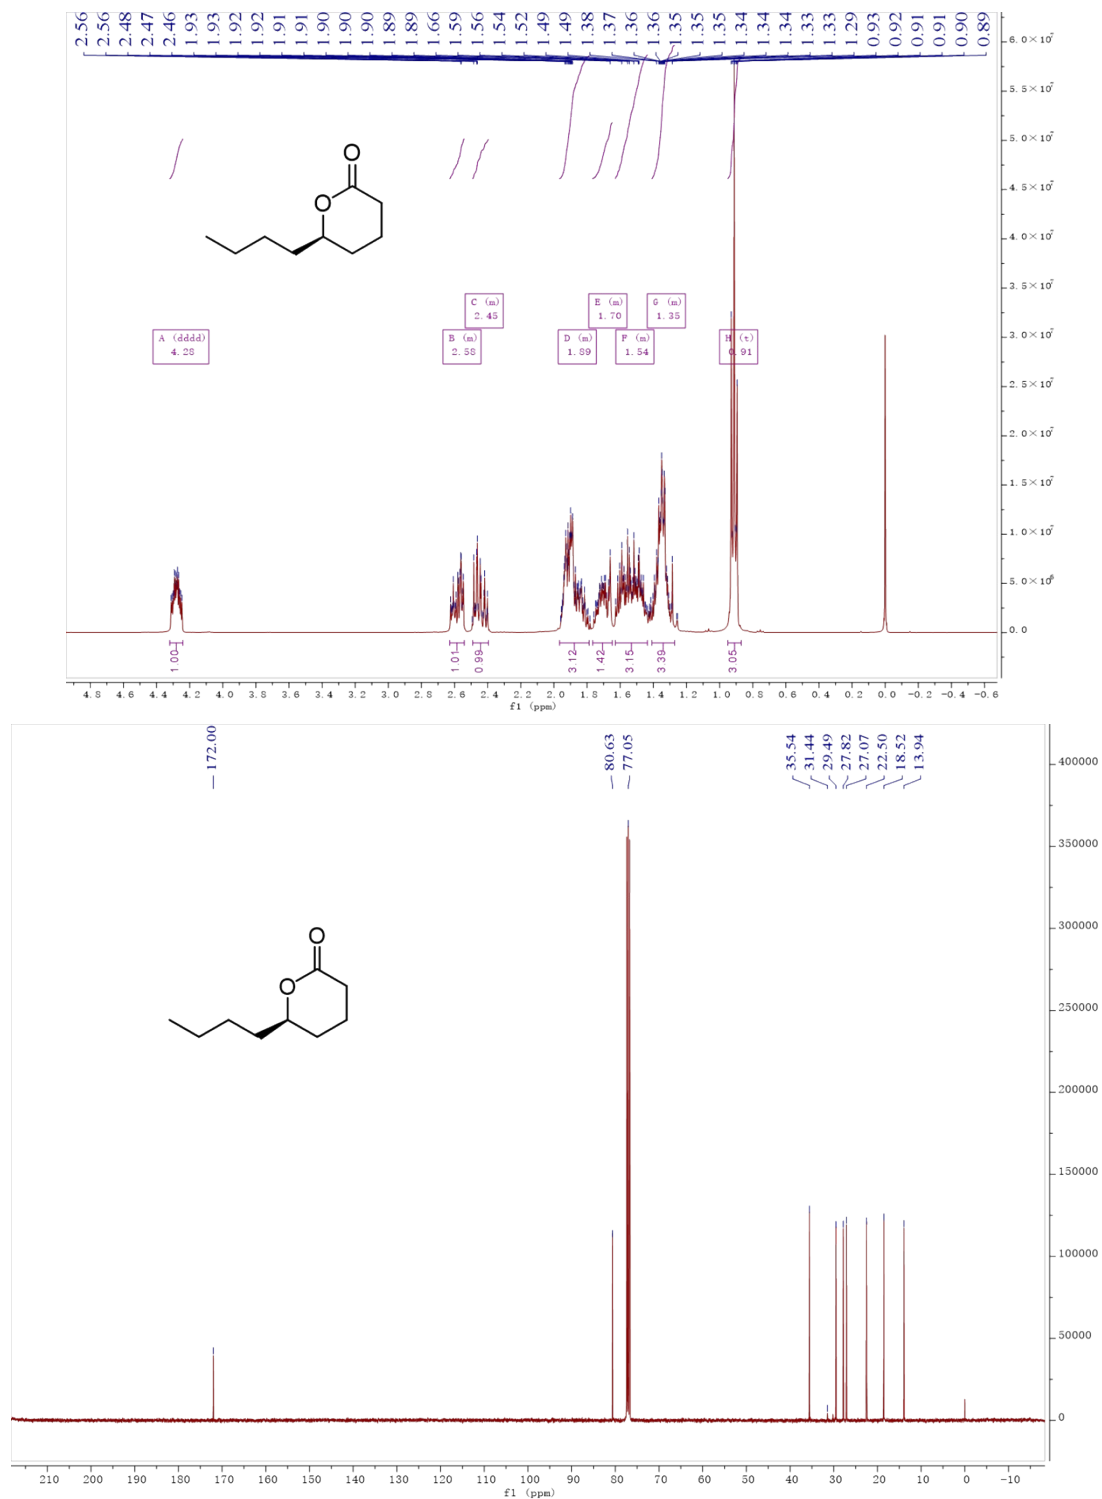

**Figure S10.** <sup>1</sup>H (400 MHz) and <sup>13</sup>C NMR (100 MHz) spectra of (R)-3g in CDCl<sub>3</sub>.

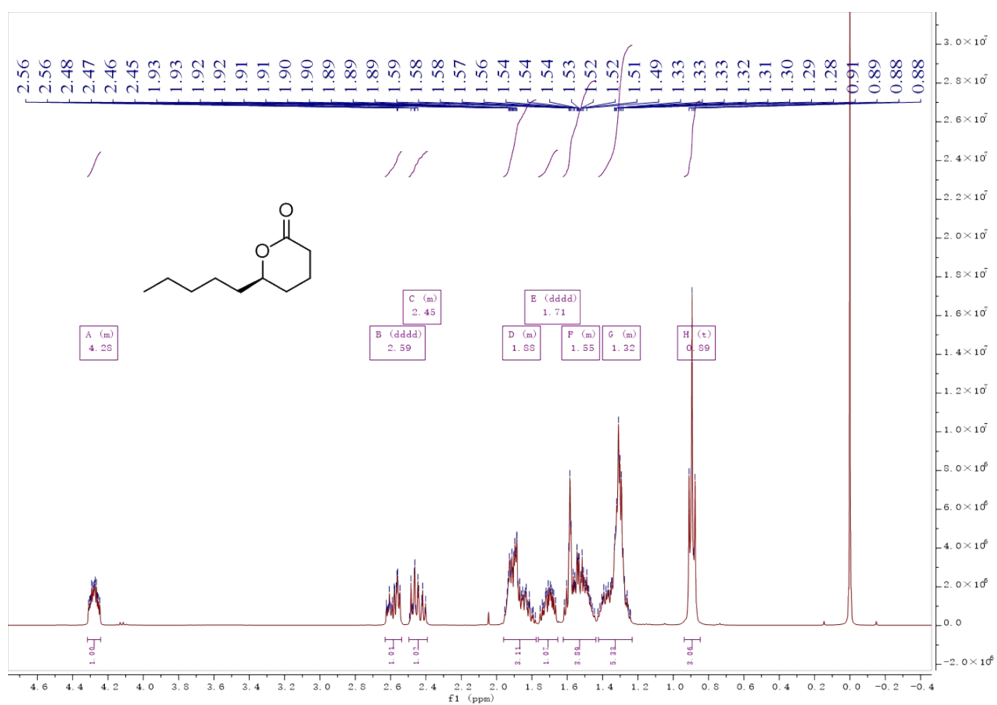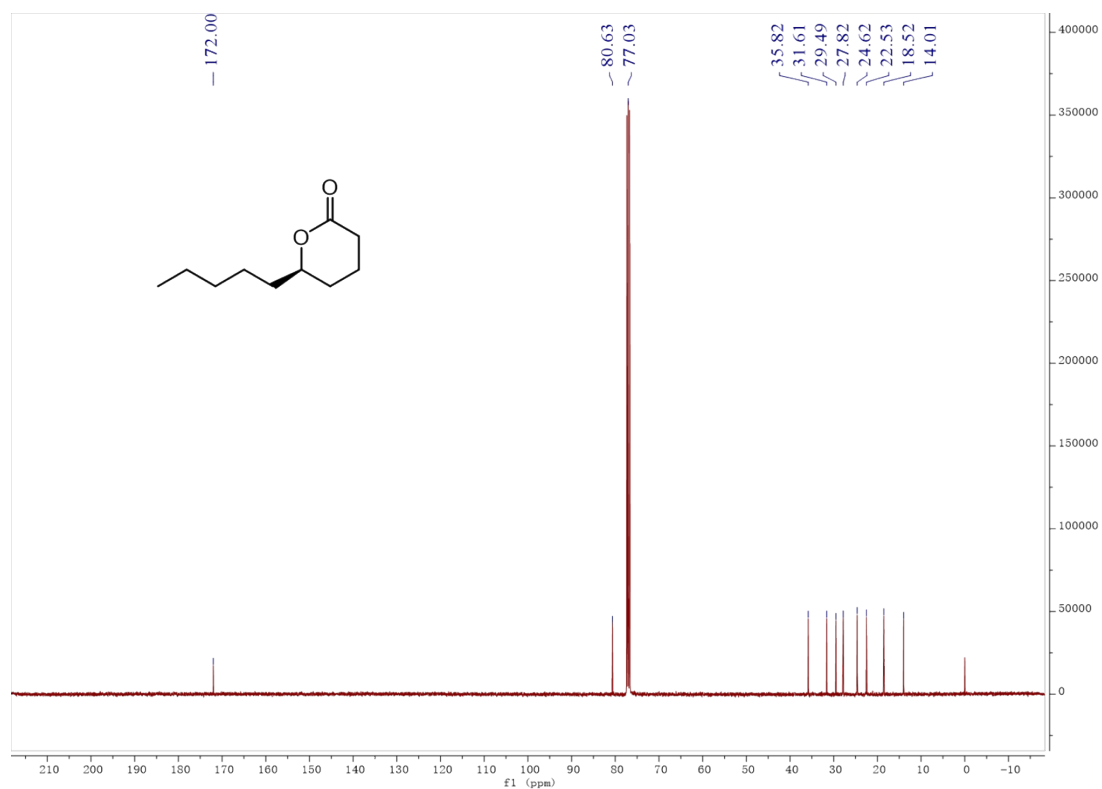

**Figure S11.**  $^1\text{H}$  (400 MHz) and  $^{13}\text{C}$  NMR (100 MHz) spectra of (*R*)-3h in  $\text{CDCl}_3$ .

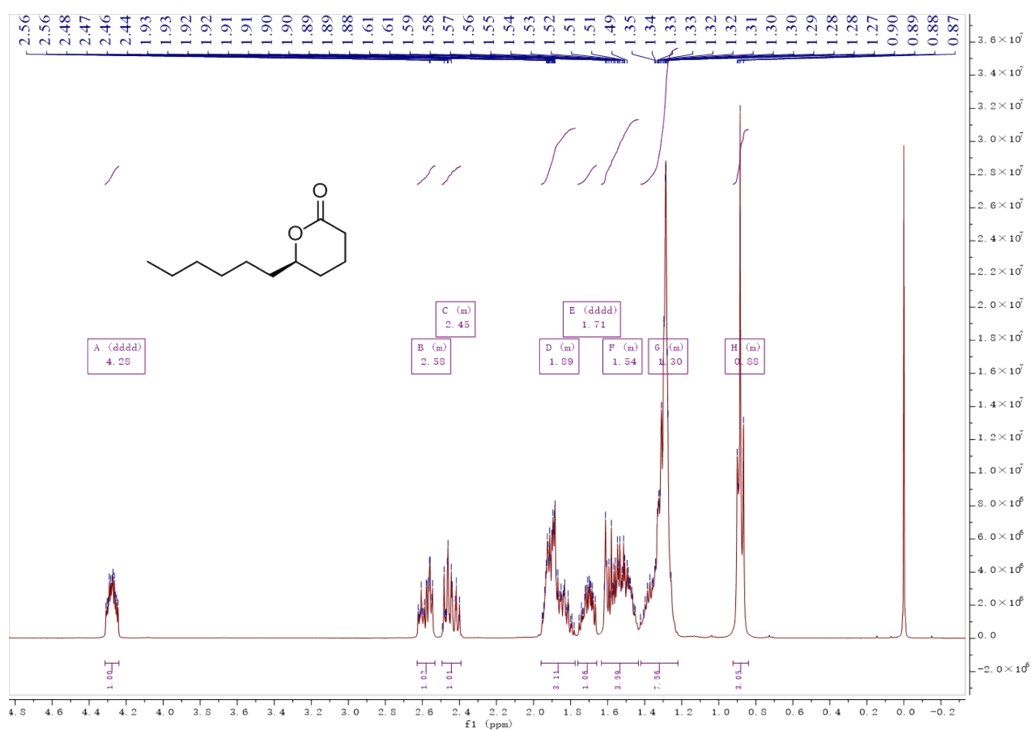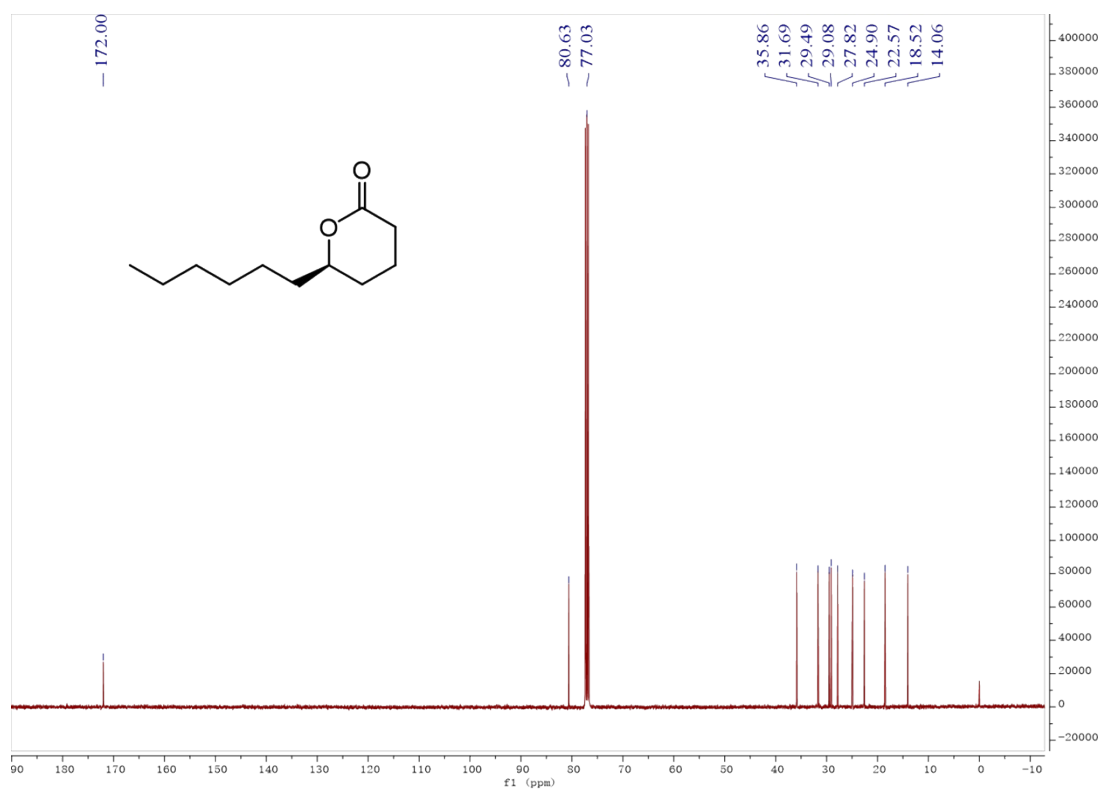

**Figure S12.**  $^1\text{H}$  (400 MHz) and  $^{13}\text{C}$  NMR (100 MHz) spectra of (R)-3i in  $\text{CDCl}_3$ .

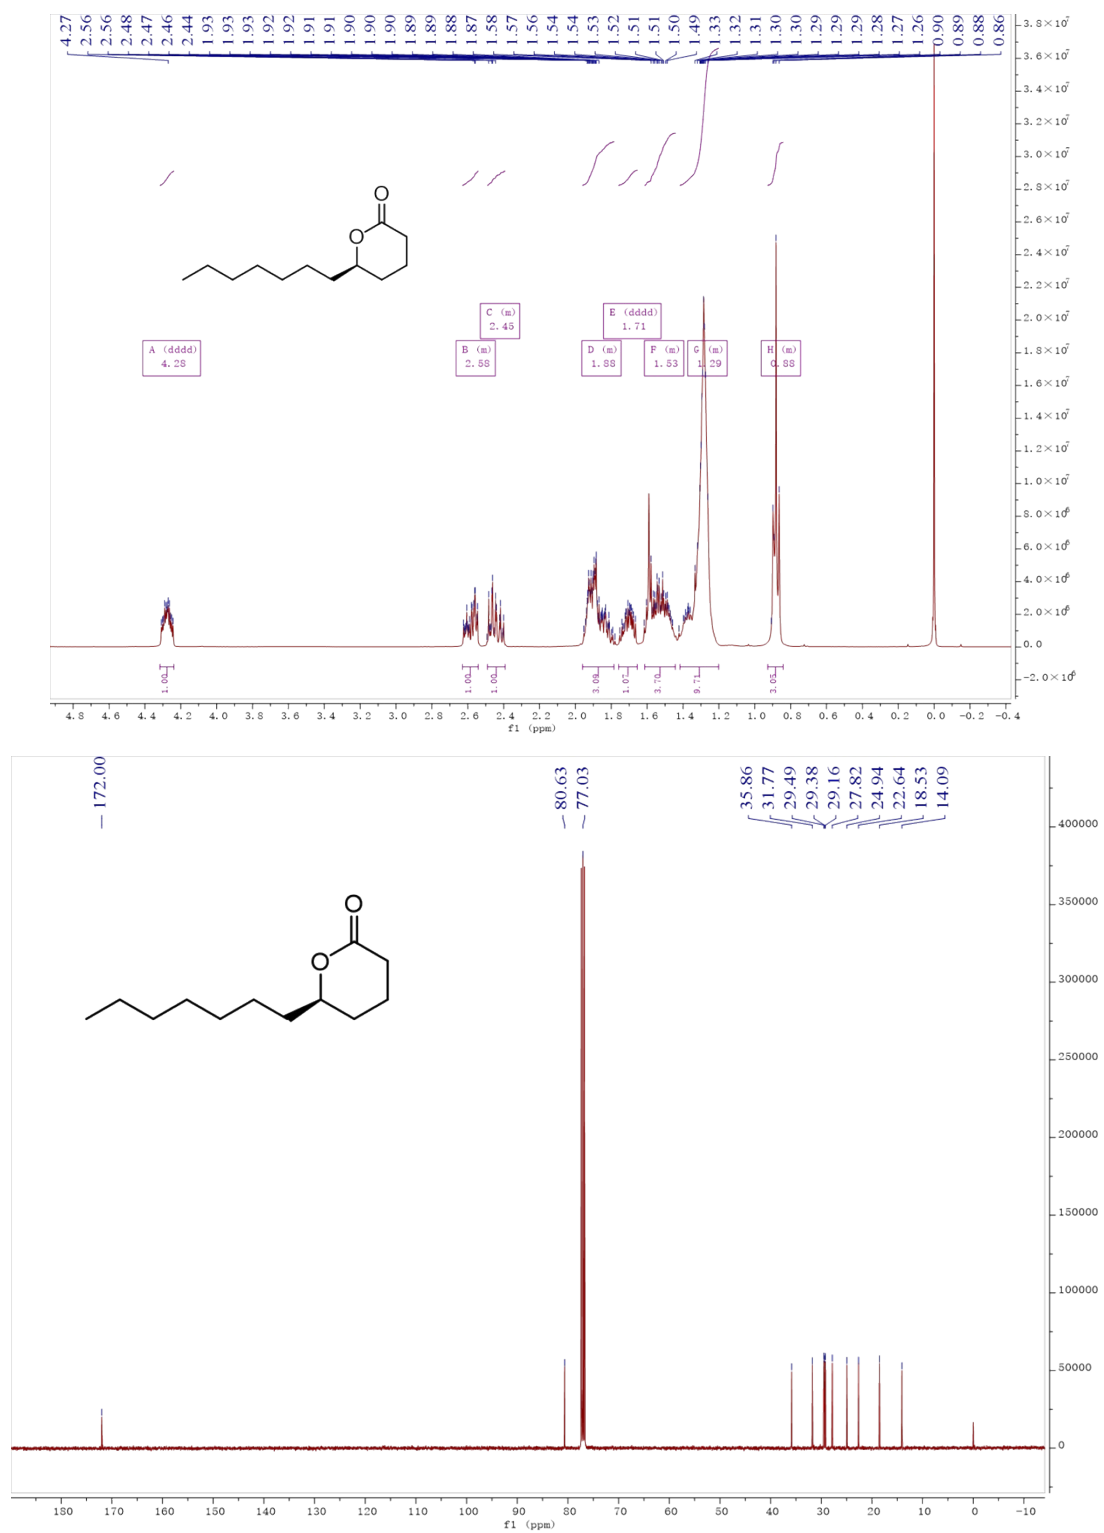

**Figure S13.** <sup>1</sup>H (400 MHz) and <sup>13</sup>C NMR (100 MHz) spectra of (*R*)-3j in CDCl<sub>3</sub>.

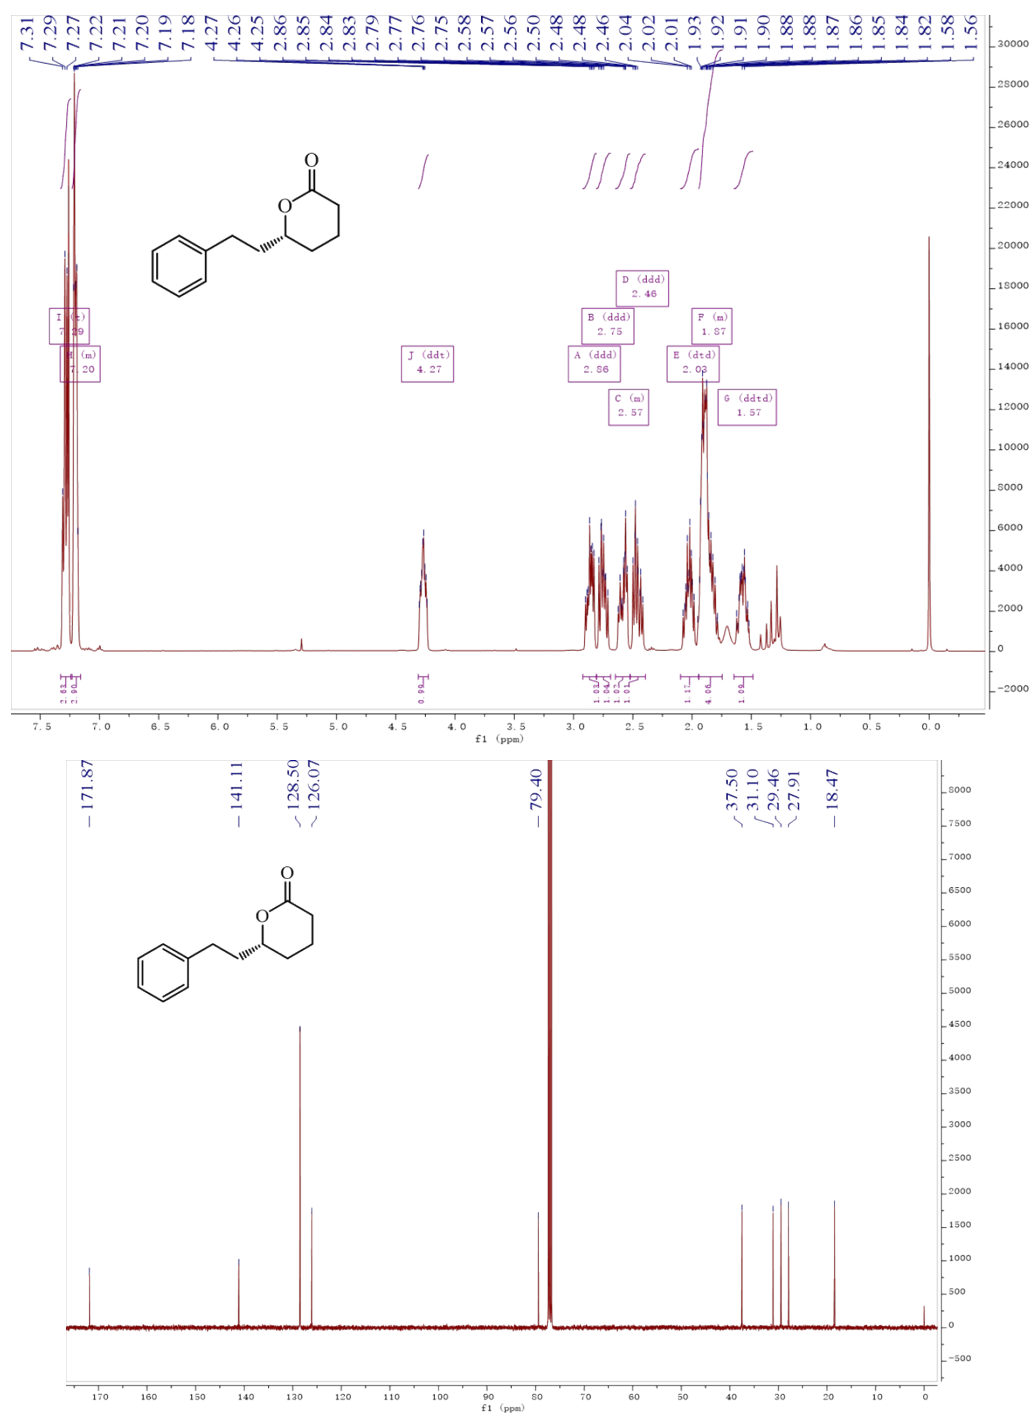

**Figure S14.** <sup>1</sup>H (400 MHz) and <sup>13</sup>C NMR (100 MHz) spectra of (*R*)-3m in CDCl<sub>3</sub>.
